# Supplementary material for: Enhancing thermostability of iron ethylene polymerization catalysts through N,N,N-chelation of doubly fused α,α′-bis(arylimino)-2,3:5,6-bis(hexamethylene)pyridines
Source: Royal Society of Chemistry journal article supplement (doi:10.1039/c9cy00293f), 2019-01-01
Supplement: c9cy00293f1.pdf [file c9cy00293f1.pdf]

## Supporting Information for

### Enhancing thermostability of iron ethylene polymerization catalysts through *N,N,N*-chelation of doubly fused $\alpha,\alpha'$ -bis(arylimino)-2,3:5,6-bis(hexamethylene)pyridines

Zheng Wang,<sup>a,b</sup> Randi Zhang,<sup>a,b</sup> Wenjuan Zhang,<sup>\*,c</sup> Gregory A. Solan,<sup>\*,a,d</sup> Qingbin Liu,<sup>\*,e</sup> Tongling Liang,<sup>a,b</sup> and Wen-Hua Sun<sup>\*,a,b</sup>

<sup>a</sup> Key Laboratory of Engineering Plastics and Beijing National Laboratory for Molecular Science, Institute of Chemistry, Chinese Academy of Sciences, Beijing 100190, China.

<sup>b</sup>CAS Research/Education Center for Excellence in Molecular Sciences, University of Chinese Academy of Sciences, Beijing 100049, China.

<sup>c</sup> Beijing Key Laboratory of Clothing Materials R&D and Assessment, Beijing Engineering Research Center of Textile Nanofiber, School of materials Science and Engineering, Beijing institute of Fashion Technology, Beijing 100029, China.

<sup>d</sup> Department of Chemistry, University of Leicester, University Road, Leicester LE1 7RH, UK.

<sup>e</sup> College of Chemistry and Material Science, Hebei Normal University, Shijiazhuang 050024, China.

\*E-mail: zhangwj@bift.edu.cn (W.Z.); gas8@leicester.ac.uk (G.A.S.); qbinliu@sina.com (Q.L.); whsun@iccas.ac.cn; Tel: +86-10-62557955; Fax: +86-10-62618239 (W.-H.S.)

| Table of Contents                                                                                                                                                                                                                                                                | Page |
|----------------------------------------------------------------------------------------------------------------------------------------------------------------------------------------------------------------------------------------------------------------------------------|------|
| 1. General considerations                                                                                                                                                                                                                                                        | S2   |
| 2. Oxidation of <b>Fe3</b> to <b>Fe3'</b>                                                                                                                                                                                                                                        | S2   |
| 3. Comparison of the catalytic performance of ( <b>G</b> )FeCl <sub>2</sub> ( <b>Fe1</b> ) with previous iron catalysts bearing <b>A</b> , <b>B</b> , <b>D</b> <sub>Me</sub> (R = Me), <b>D</b> <sub>Ph</sub> (R = Ph) and <b>F</b> at 80 °C; MAO used as activator in each case | S3   |
| 4. X-Ray crystallographic studies                                                                                                                                                                                                                                                | S4   |
| 5. DSC thermograms of the polyethylenes                                                                                                                                                                                                                                          | S5   |
| 6. References                                                                                                                                                                                                                                                                    | S27  |

## 1. General considerations

All manipulations involving air- and moisture-sensitive compounds were carried out under nitrogen atmosphere using standard Schlenk techniques. Toluene was heated to reflux over sodium and distilled under nitrogen prior to use. The NMR spectra were recorded with a Bruker DMX 500 MHz and 600 MHz instrument at ambient temperature using TMS as internal standard. The melting points of the polyethylenes were measured from the fourth scanning run on a PerkinElmer TA-Q2000 differential scanning calorimeter under a nitrogen atmosphere. A sample of about 5.0 mg was heated to 160 °C at a rate of 20 °C min<sup>-1</sup>, maintained for 2 min at 160 °C to remove the thermal history and then cooled to -40 °C at a rate of 20 °C min<sup>-1</sup>. <sup>13</sup>C NMR spectra of the polyethylenes were recorded with a Bruker DMX 300 MHz instrument at 135 °C in 1,1,2,2-*d*<sub>2</sub>-tetrachloroethane with TMS as internal standard. The compound  $\alpha,\alpha'$ -dioxo-2,3:5,6-bis(hexamethylene)pyridine was prepared by the reported method.<sup>1,2</sup>

## 2. Oxidation of Fe3 to Fe3'

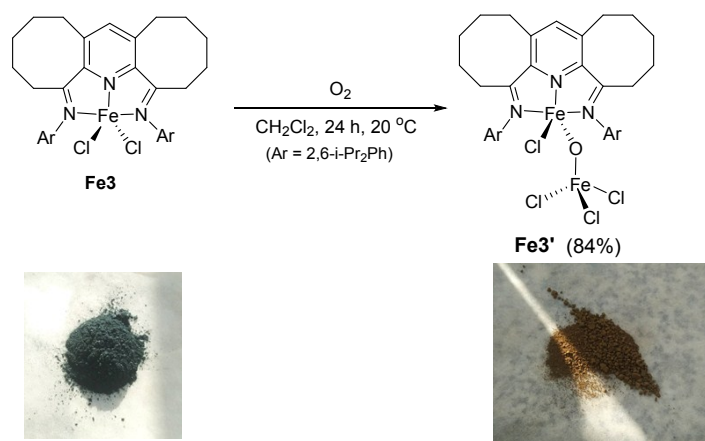

A sample of **Fe3** (0.35 g, 0.50 mmol) dissolved in dichloromethane (25 mL) was stirred for 24 h at 20 °C under an atmosphere of oxygen (or 120 hours under air) resulting in a color change from blue to light green. The solvent was removed under reduced pressure and diethyl ether (20 mL) added to induce precipitation. The solid was filtered, washed with diethyl ether and dried under reduced pressure affording [2,3:5,6-{C<sub>5</sub>H<sub>10</sub>C=N(2,6-*i*-Pr<sub>2</sub>Ph)}<sub>2</sub>C<sub>5</sub>HN]FeCl(μ-O)FeCl<sub>3</sub> (**Fe3'**) as a yellow solid (0.18 g, 84%). FT-IR (cm<sup>-1</sup>): 2963 (m), 2929 (m), 2864 (w), 1677 (m,  $\nu_{\text{C=N}}$ ) 1584 (m), 1543 (w), 1453 (s), 1385 (w), 1360 (w), 1306 (w), 1248 (m), 1188 (w), 1162 (w), 1110 (w), 1052 (w), 1009 (w), 932 (w), 844 (w,  $\nu_{\text{Fe-O-Fe}}$ ), 799 (m), 754 (m). Anal. Calcd for C<sub>41</sub>H<sub>55</sub>Cl<sub>4</sub>Fe<sub>2</sub>N<sub>3</sub>O (859.40): C, 57.30, H, 6.45, N, 4.89; found: C, 57.22, H, 6.23, N, 4.70%.

3. Comparison of the catalytic performance of (**G**)FeCl<sub>2</sub> (**Fe1**) with previous iron catalysts bearing **A**,<sup>3</sup> **B**,<sup>4</sup> **D**<sub>Me</sub> (R = Me),<sup>5</sup> **D**<sub>Ph</sub> (R = Ph),<sup>6</sup> and **F**<sup>7</sup> at 80 °C; MAO used as activator in each case.

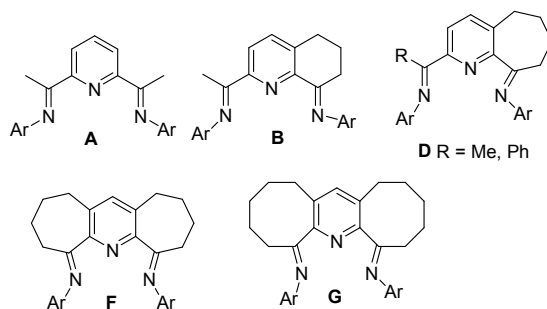

**Table S1.** Polymerization screening using (**A**)FeCl<sub>2</sub>/MAO<sup>a,3</sup>

| Run | Al:Fe | T (°C) | t (min) | Mass of PE (g) | Activity <sup>b</sup> | $M_w^c$ | $M_w/M_n^c$ | $T_m$ (°C) <sup>d</sup> |
|-----|-------|--------|---------|----------------|-----------------------|---------|-------------|-------------------------|
| 1   | 2000  | 80     | 30      | 5.70           | 5.70                  | 38.5    | 8.3         | 130.0                   |

<sup>a</sup> Conditions: 2.0 μmol of iron complex; 100 mL toluene, 10 atm C<sub>2</sub>H<sub>4</sub>. <sup>b</sup> Values in units of 10<sup>6</sup> g(PE) mol<sup>-1</sup> (Fe) h<sup>-1</sup>.

<sup>c</sup> Determined by GPC, and  $M_w$  in kg mol<sup>-1</sup>. <sup>d</sup> Determined by DSC.

**Table S2.** Polymerization screening using (**B**)FeCl<sub>2</sub>/MAO<sup>a,4</sup>

| Run | Al:Fe | T (°C) | t (min) | Mass of PE (g) | Activity <sup>b</sup> | $M_w^c$ | $M_w/M_n^c$ | $T_m$ (°C) <sup>d</sup> |
|-----|-------|--------|---------|----------------|-----------------------|---------|-------------|-------------------------|
| 1   | 2000  | 80     | 30      | 10.20          | 6.81                  | 18.5    | 4.3         | 127.6                   |

<sup>a</sup> Conditions: 3.0 μmol of iron complex; 100 mL toluene, 10 atm C<sub>2</sub>H<sub>4</sub>. <sup>b</sup> Values in units of 10<sup>6</sup> g(PE) mol<sup>-1</sup> (Fe) h<sup>-1</sup>.

<sup>c</sup> Determined by GPC, and  $M_w$  in kg mol<sup>-1</sup>. <sup>d</sup> Determined by DSC.

**Table S3.** Polymerization screening using (**D**<sub>Me</sub>)FeCl<sub>2</sub>/MAO<sup>a,5</sup>

| Run | Al:Fe | T (°C) | t (min) | Mass of PE (g) | Act. <sup>b</sup> | $M_w^c$ | $M_w/M_n^c$ | $T_m$ (°C) <sup>d</sup> |
|-----|-------|--------|---------|----------------|-------------------|---------|-------------|-------------------------|
| 1   | 2500  | 80     | 30      | 9.30           | 6.20              | 13.7    | 3.8         | 129.0                   |

<sup>a</sup> Conditions: 3.0 μmol of iron complex; 100 mL toluene, 10 atm C<sub>2</sub>H<sub>4</sub>. <sup>b</sup> Values in units of 10<sup>6</sup> g(PE) mol<sup>-1</sup> (Fe) h<sup>-1</sup>.

<sup>c</sup> Determined by GPC and  $M_w$  in kg mol<sup>-1</sup>. <sup>d</sup> Determined by DSC.

**Table S4.** Polymerization screening using (**D**<sub>Ph</sub>)FeCl<sub>2</sub>/MAO<sup>a,6</sup>

| Run | Al:Fe | T (°C) | t (min) | Mass of PE (g) | Activity <sup>b</sup> | $M_w^c$ | $M_w/M_n^c$ | $T_m$ (°C) <sup>d</sup> |
|-----|-------|--------|---------|----------------|-----------------------|---------|-------------|-------------------------|
| 1   | 2000  | 80     | 30      | 10.30          | 6.87                  | 4.4     | 2.9         | 126.5                   |

<sup>a</sup> Conditions: 3.0 μmol of iron complex; 100 mL toluene, 10 atm C<sub>2</sub>H<sub>4</sub>. <sup>b</sup> Values in units of 10<sup>6</sup> g(PE) mol<sup>-1</sup> (Fe) h<sup>-1</sup>.

<sup>c</sup> Determined by GPC, and  $M_w$  in kg mol<sup>-1</sup>. <sup>d</sup> Determined by DSC.

**Table S5.** Polymerization screening using (**F**)FeCl<sub>2</sub>/MAO<sup>a,7</sup>

| Run | Al:Fe | T (°C) | t (min) | Mass of PE (g) | Activity <sup>b</sup> | $M_w^c$ | $M_w/M_n^c$ | $T_m$ (°C) <sup>d</sup> |
|-----|-------|--------|---------|----------------|-----------------------|---------|-------------|-------------------------|
| 1   | 2000  | 80     | 30      | 14.62          | 9.75                  | 12.7    | 13.7        | 128.9                   |

<sup>a</sup> Conditions: 3.0 μmol of iron complex; 100 mL toluene, 10 atm C<sub>2</sub>H<sub>4</sub>. <sup>b</sup> Values in units of 10<sup>6</sup> g(PE) mol<sup>-1</sup> (Fe) h<sup>-1</sup>.

<sup>c</sup> Determined by GPC, and  $M_w$  in kg mol<sup>-1</sup>. <sup>d</sup> Determined by DSC.

#### 4. X-Ray crystallographic studies

**Table S6.** Crystal data and structure refinement for **Fe3** and **Fe3'**

| Identification code                         | <b>Fe3</b> ·THF                                                                                | <b>Fe3'</b>                                                                      |
|---------------------------------------------|------------------------------------------------------------------------------------------------|----------------------------------------------------------------------------------|
| Empirical formula                           | C <sub>90</sub> H <sub>122</sub> Cl <sub>4</sub> Fe <sub>2</sub> N <sub>6</sub> O <sub>2</sub> | C <sub>41</sub> H <sub>55</sub> N <sub>3</sub> Cl <sub>4</sub> Fe <sub>2</sub> O |
| Formula weight                              | 1573.43                                                                                        | 859.41                                                                           |
| Temperature/K                               | 293(2)                                                                                         | 175.15                                                                           |
| Crystal system                              | monoclinic                                                                                     | monoclinic                                                                       |
| Space group                                 | P2 <sub>1</sub> /c                                                                             | P2 <sub>1</sub> /c                                                               |
| a/Å                                         | 13.3638(3)                                                                                     | 12.228(2)                                                                        |
| b/Å                                         | 34.6037(6)                                                                                     | 21.820(4)                                                                        |
| c/Å                                         | 18.3685(4)                                                                                     | 16.338(3)                                                                        |
| α/°                                         | 90                                                                                             | 90                                                                               |
| β/°                                         | 102.600(2)                                                                                     | 104.20(3)                                                                        |
| γ/°                                         | 90                                                                                             | 90                                                                               |
| Volume/Å <sup>3</sup>                       | 8289.7(3)                                                                                      | 4225.9(16)                                                                       |
| Z                                           | 4                                                                                              | 4                                                                                |
| ρ <sub>calc</sub> /g/cm <sup>3</sup>        | 1.261                                                                                          | 1.3507                                                                           |
| μ/mm <sup>-1</sup>                          | 0.530                                                                                          | 0.974                                                                            |
| F(000)                                      | 3360.0                                                                                         | 1805.7                                                                           |
| Crystal size/mm <sup>3</sup>                | 0.355 × 0.080 × 0.035                                                                          | 0.355 × 0.071 × 0.063                                                            |
| Radiation                                   | Mo-K <sub>α</sub> (λ = 0.71073)                                                                | Mo-K <sub>α</sub> (λ = 0.71073)                                                  |
| 2θ range for data collection/°              | 3.272 to 55                                                                                    | 3.18 to 54.96                                                                    |
| Index ranges                                | -15 ≤ h ≤ 17, -44 ≤ k ≤ 44, -23 ≤ l ≤ 23                                                       | -14 ≤ h ≤ 15, -28 ≤ k ≤ 28, -21 ≤ l ≤ 21                                         |
| Reflections collected                       | 77124                                                                                          | 45762                                                                            |
| Independent reflections                     | 19015 [R <sub>int</sub> = 0.0632, R <sub>sigma</sub> = 0.0639]                                 | 9671 [R <sub>int</sub> = 0.0678, R <sub>sigma</sub> = 0.0522]                    |
| Data/restraints/parameters                  | 19015/0/953                                                                                    | 9671/36/496                                                                      |
| Goodness-of-fit on F <sup>2</sup>           | 1.094                                                                                          | 1.038                                                                            |
| Final R indexes [I ≥ 2σ (I)]                | R <sub>1</sub> = 0.1006, wR <sub>2</sub> = 0.2461                                              | R <sub>1</sub> = 0.0840, wR <sub>2</sub> = 0.1395                                |
| Final R indexes [all data]                  | R <sub>1</sub> = 0.1373, wR <sub>2</sub> = 0.2641                                              | R <sub>1</sub> = 0.0943, wR <sub>2</sub> = 0.1445                                |
| Largest diff. peak/hole / e Å <sup>-3</sup> | 2.80/-0.80                                                                                     | 0.81/-0.85                                                                       |

## 5. DSC thermograms of the polyethylenes

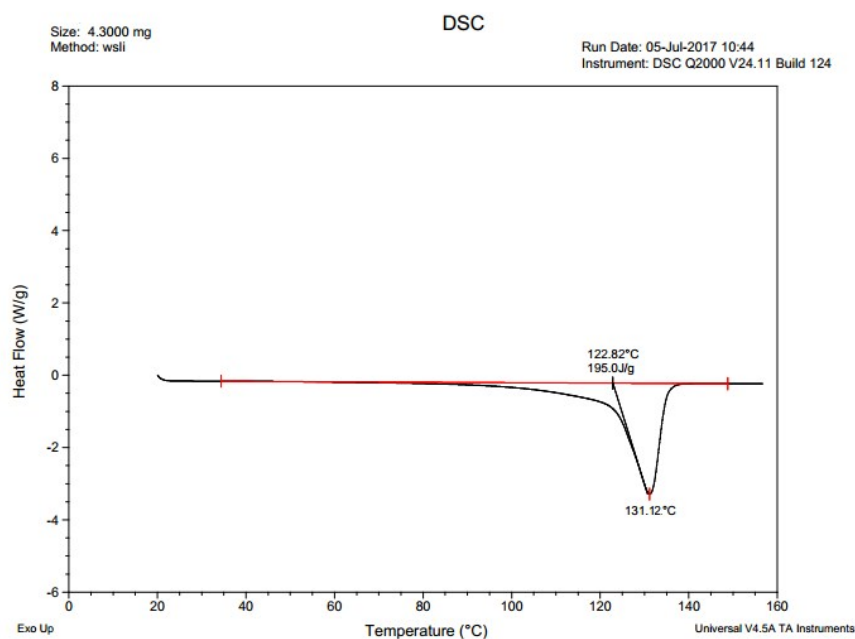

**Figure S1.** DSC thermogram of the polyethylene obtained using **Fe1**/MMAO at 30 °C (Al:Fe = 2000, Table 2, entry 1)

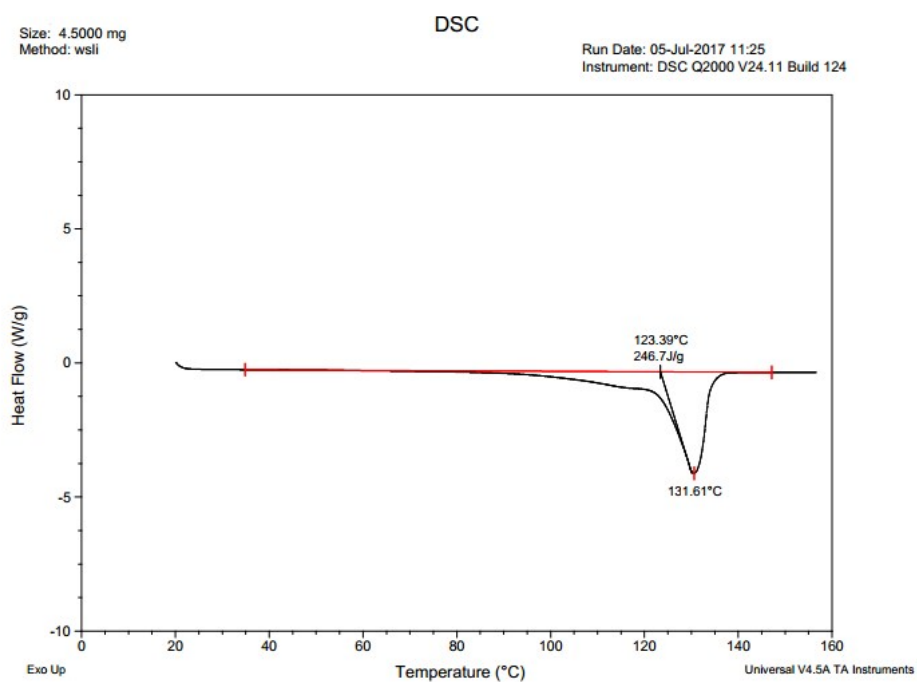

**Figure S2.** DSC thermogram of the polyethylene obtained using **Fe1**/MMAO at 40 °C (Al:Fe = 2000, Table 2, entry 2)

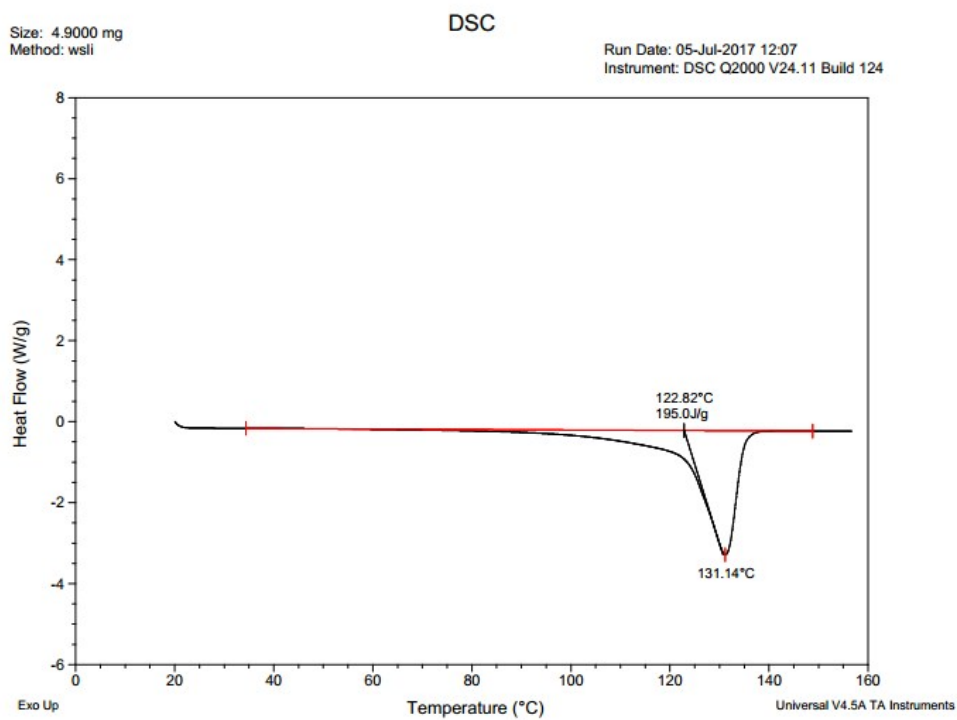

**Figure S3.** DSC thermogram of the polyethylene obtained using **FeI/MMAO** at 50 °C (Al:Fe = 2000, Table 2, entry 3)

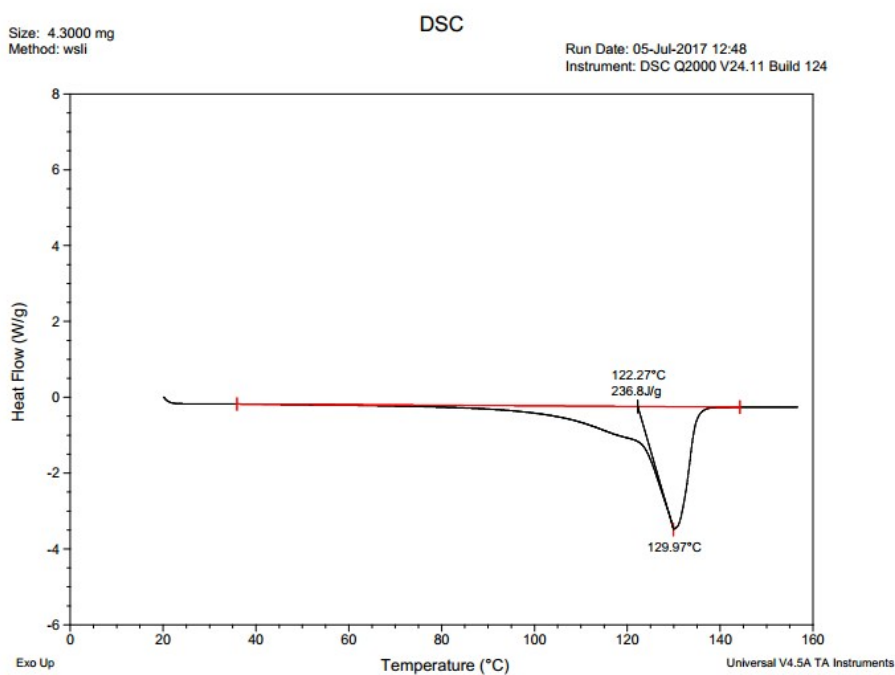

**Figure S4.** DSC thermogram of the polyethylene obtained using **FeI/MMAO** at 60 °C (Al:Fe = 2000, Table 2, entry 4)

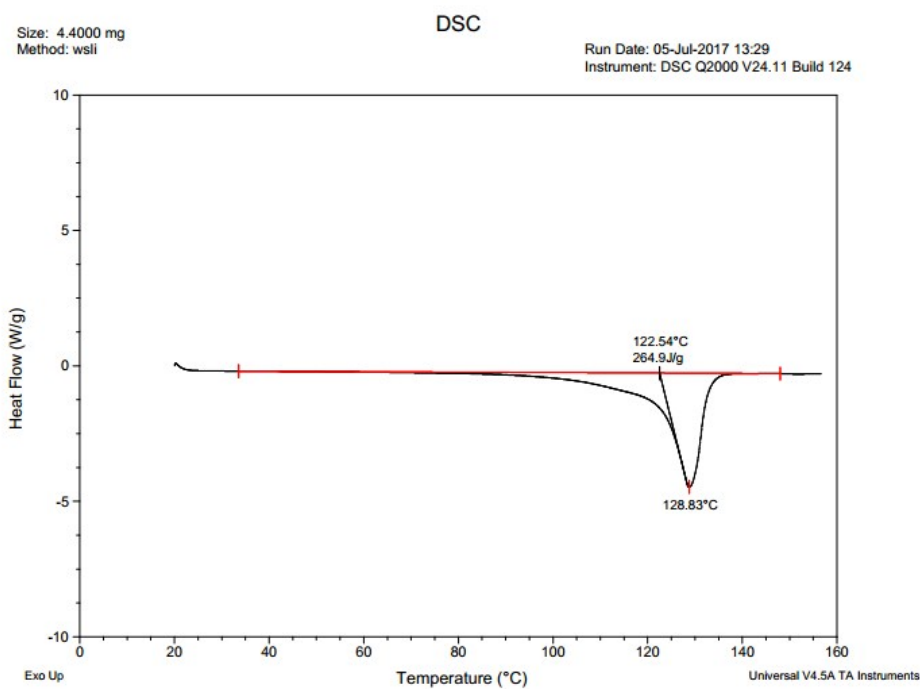

**Figure S5.** DSC thermogram of the polyethylene obtained using **Fe1**/MMAO at 70 °C (Al:Fe = 2000, Table 2, entry 5)

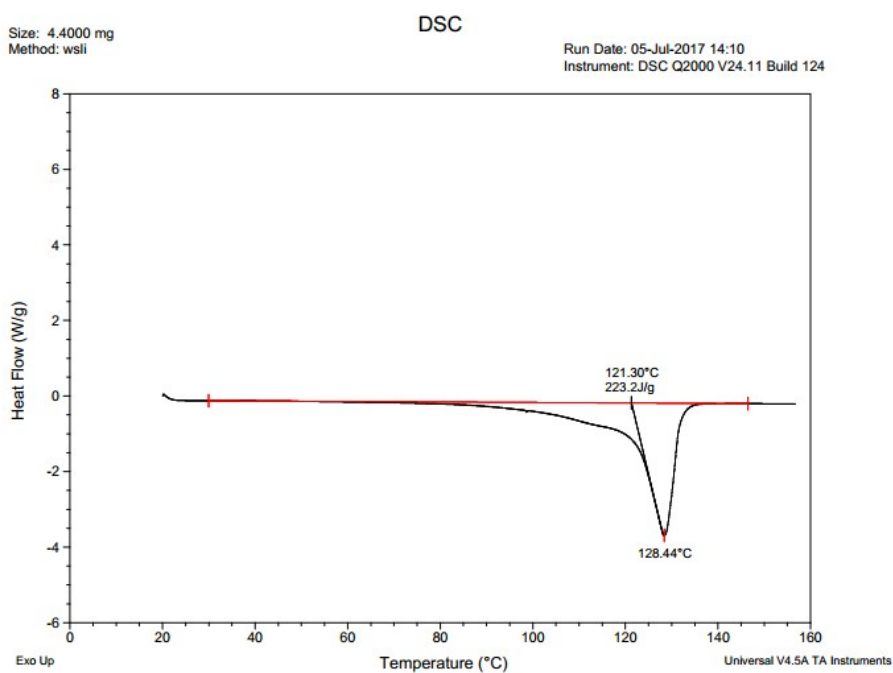

**Figure S6.** DSC thermogram of the polyethylene obtained using **Fe1**/MMAO at 80 °C (Al:Fe = 2000, Table 2, entry 6)

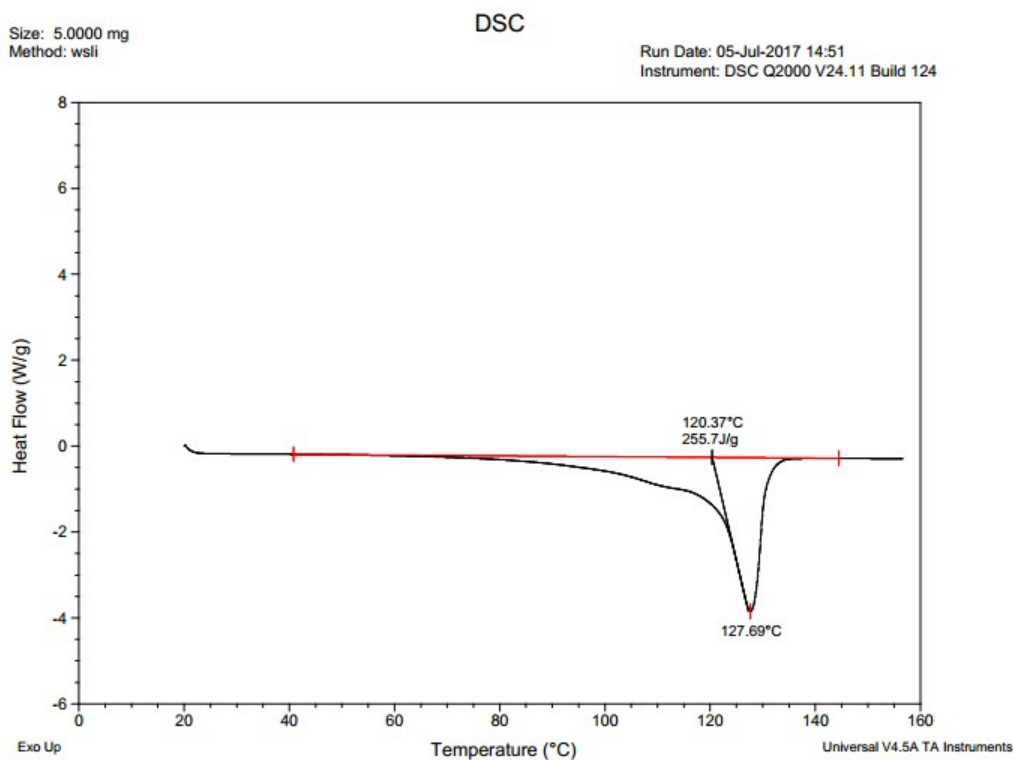

**Figure S7.** DSC thermogram of the polyethylene obtained using **Fe1/MMAO** at 90 °C (Al:Fe = 2000, Table 2, entry 7)

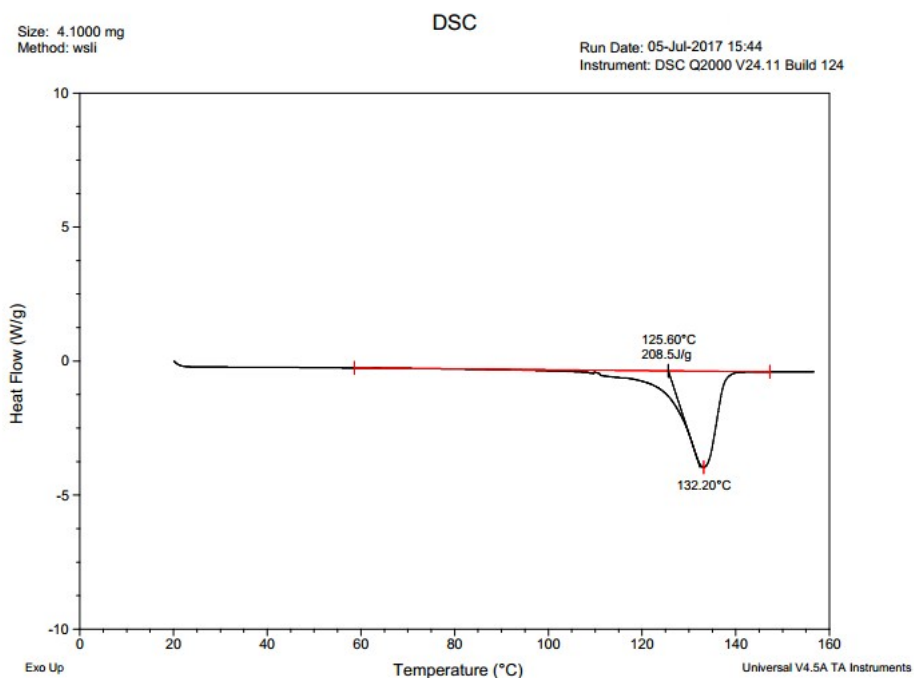

**Figure S8.** DSC thermogram of the polyethylene obtained using **Fe1/MMAO** at Al:Fe = 1500 (50 °C, Table 2, entry 8)



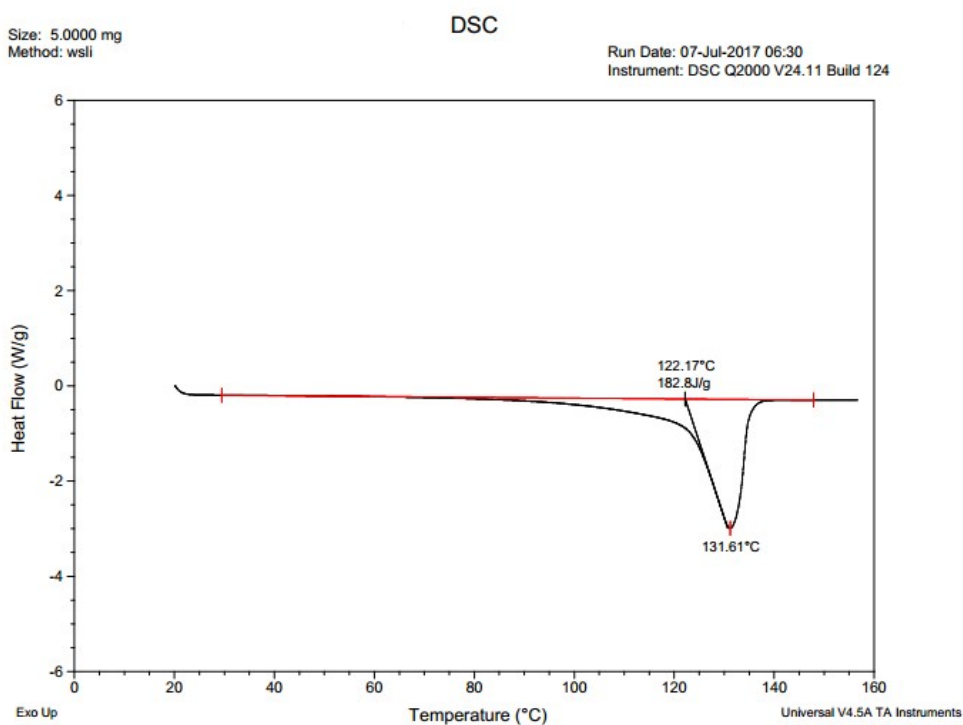

**Figure S9.** DSC thermogram of the polyethylene obtained using **Fe1**/MMAO at Al:Fe = 1750 (50 °C, Table 2, entry 9)

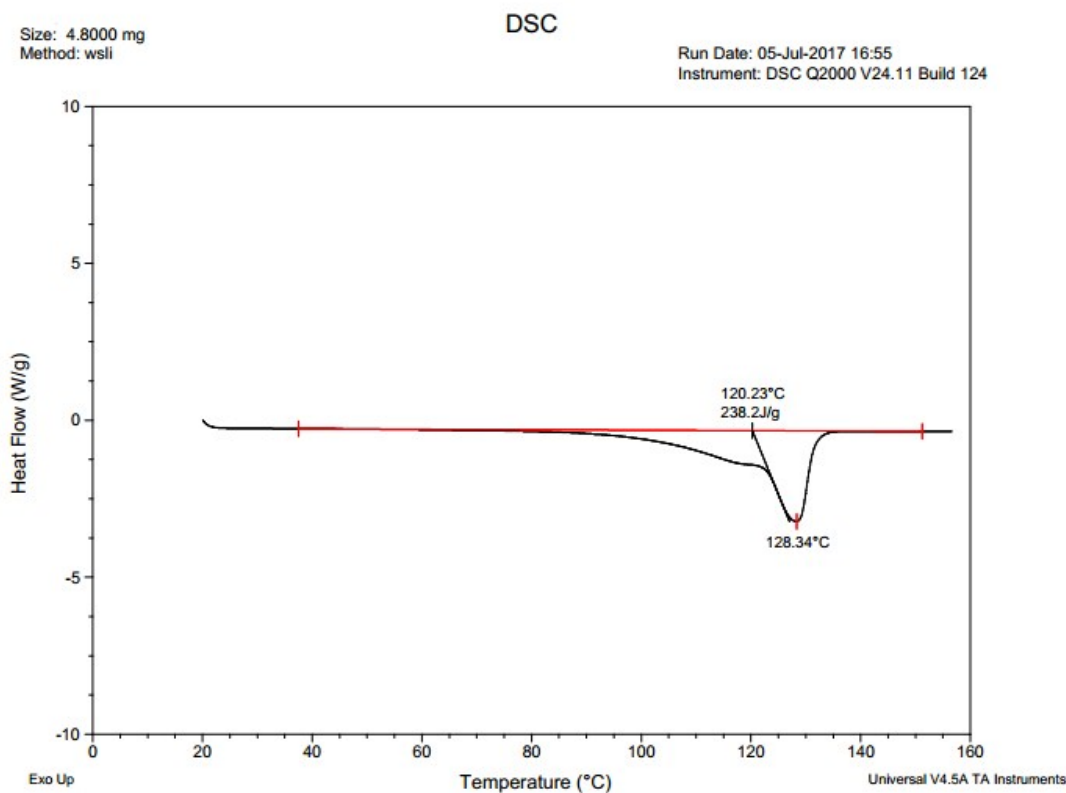

**Figure S10.** DSC thermogram of the polyethylene obtained using **Fe1**/MMAO at Al:Fe = 2250 (50 °C, Table 2, entry 10)

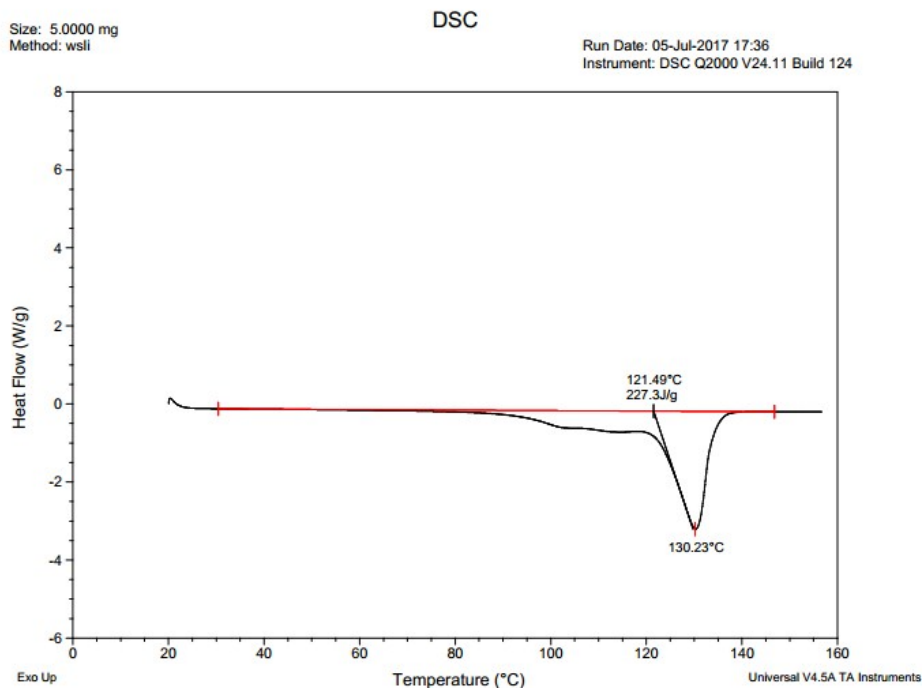

**Figure S11.** DSC thermogram of the polyethylene obtained using **Fe1/MMAO** at Al:Fe = 2500 (50 °C, Table 2, entry 11)

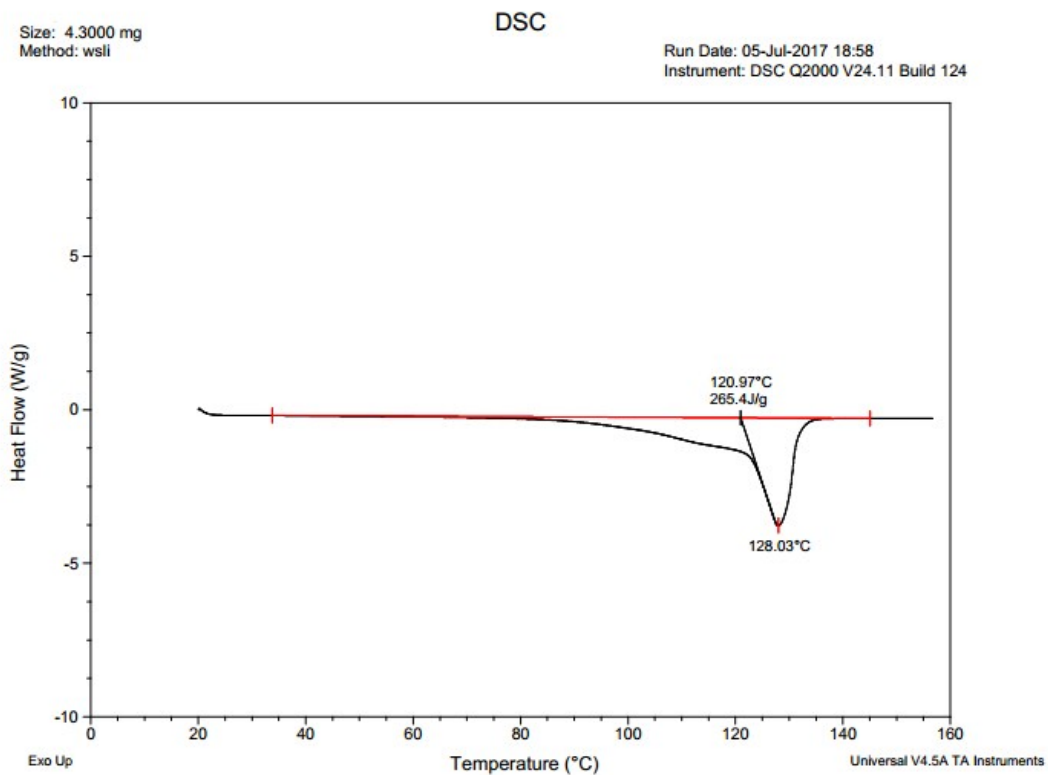

**Figure S12.** DSC thermogram of the polyethylene obtained using **Fe1/MMAO** after 5 minutes (Al:Fe = 2000, 50 °C, Table 2, entry 12)

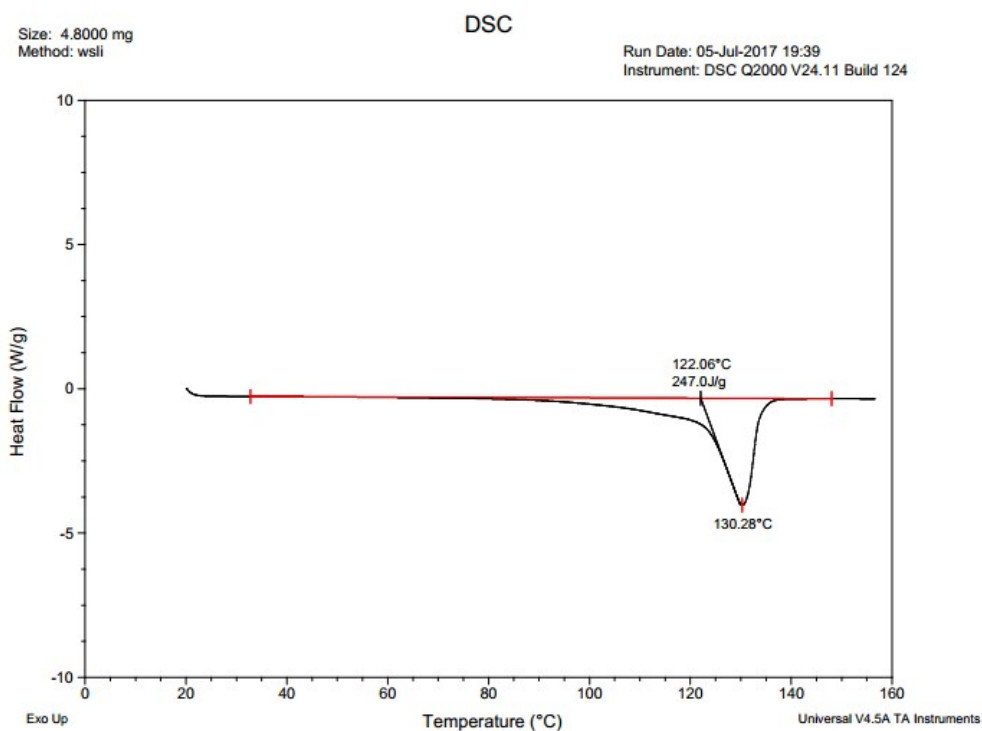

**Figure S13.** DSC thermogram of the polyethylene obtained using **Fe1**/MMAO after 15 minutes (Al:Fe = 2000, 50 °C, Table 2, entry 13)

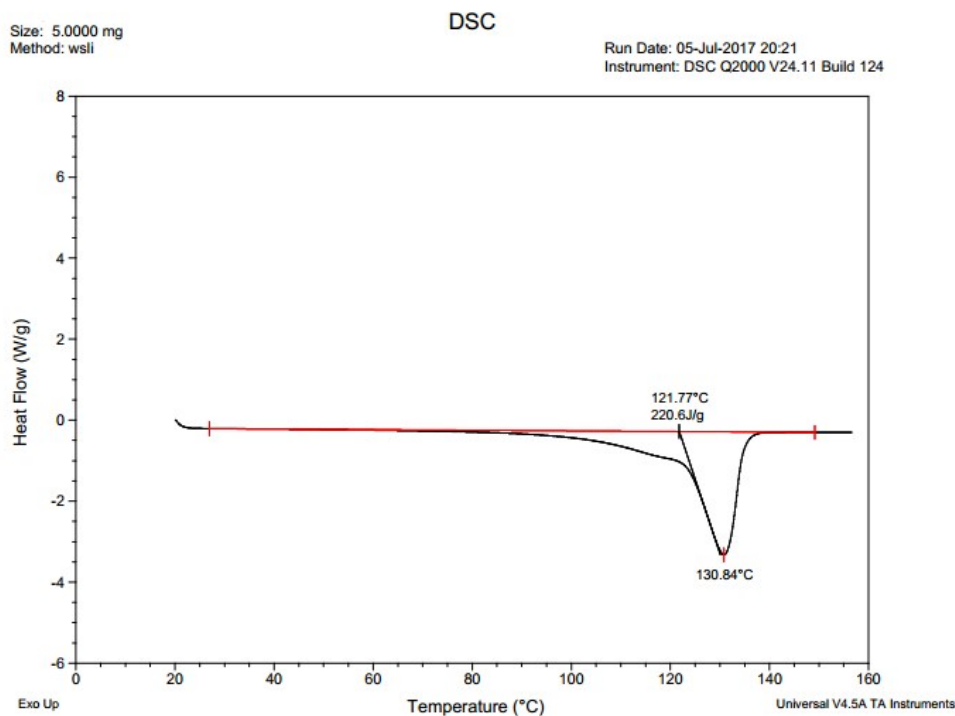

**Figure S14.** DSC thermogram of the polyethylene obtained using **Fe1**/MMAO after 45 minutes (Al:Fe = 2000, 50 °C, Table 2, entry 14)

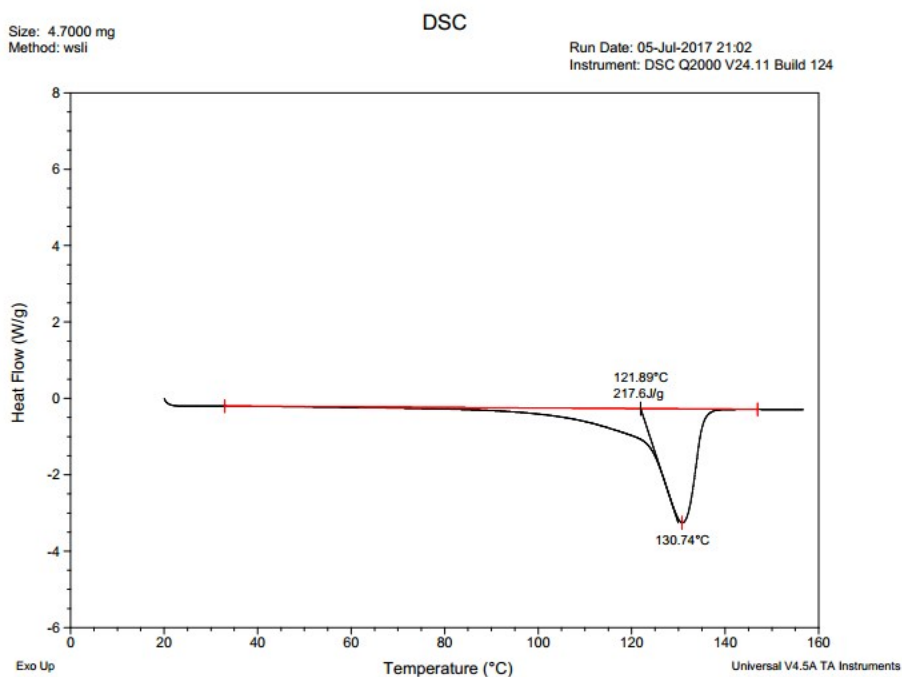

**Figure S15.** DSC thermogram of the polyethylene obtained using **Fe1/MMAO** after 60 minutes (Al:Fe = 2000, 50 °C, Table 2, entry 15)

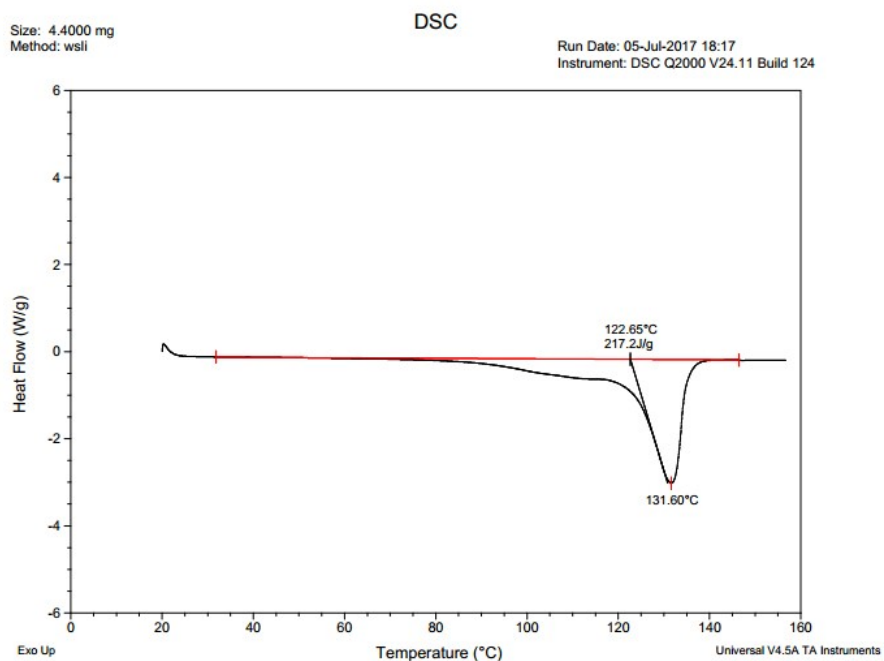

**Figure S16.** DSC thermogram of the polyethylene obtained using **Fe1/MMAO** at 5 atm ethylene (Al:Fe = 2000, 50 °C, Table 2, entry 16)

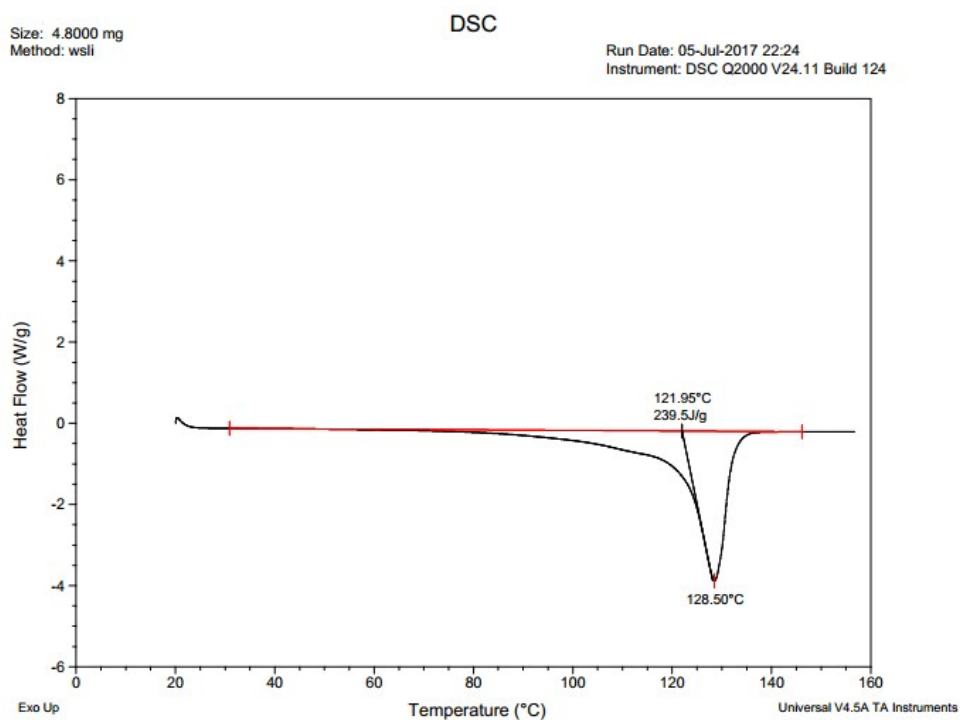

**Figure S17.** DSC thermogram of the polyethylene obtained using **Fe1**/MMAO at 1 atm ethylene (Al:Fe = 2000, 50 °C, Table 2, entry 17)

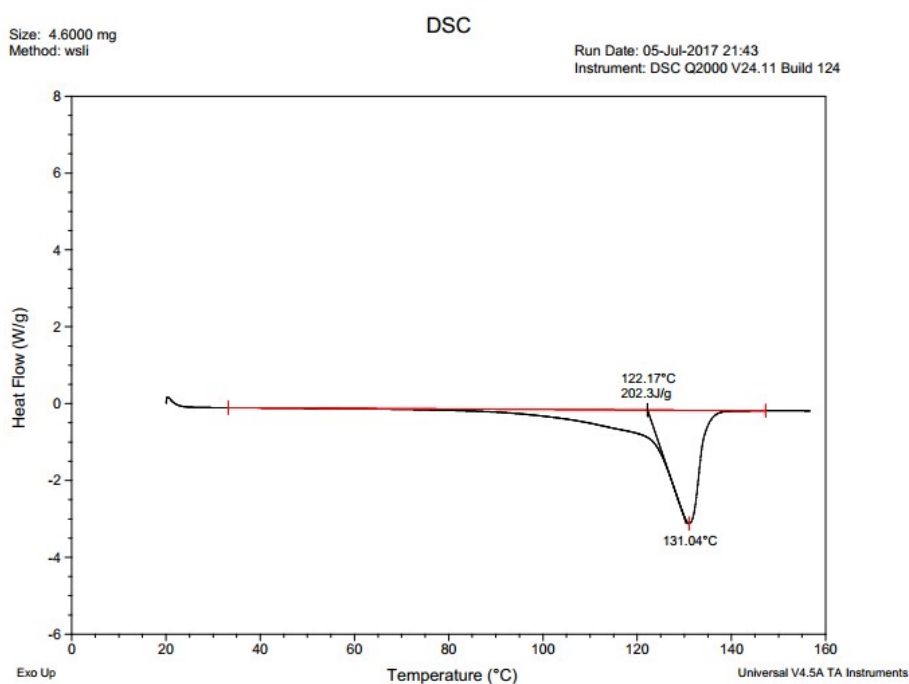

**Figure S18.** DSC thermogram of the polyethylene obtained using **Fe2**/MMAO at 10 atm ethylene (Al:Fe = 2000, 50 °C, 30 min, Table 3, entry 2)

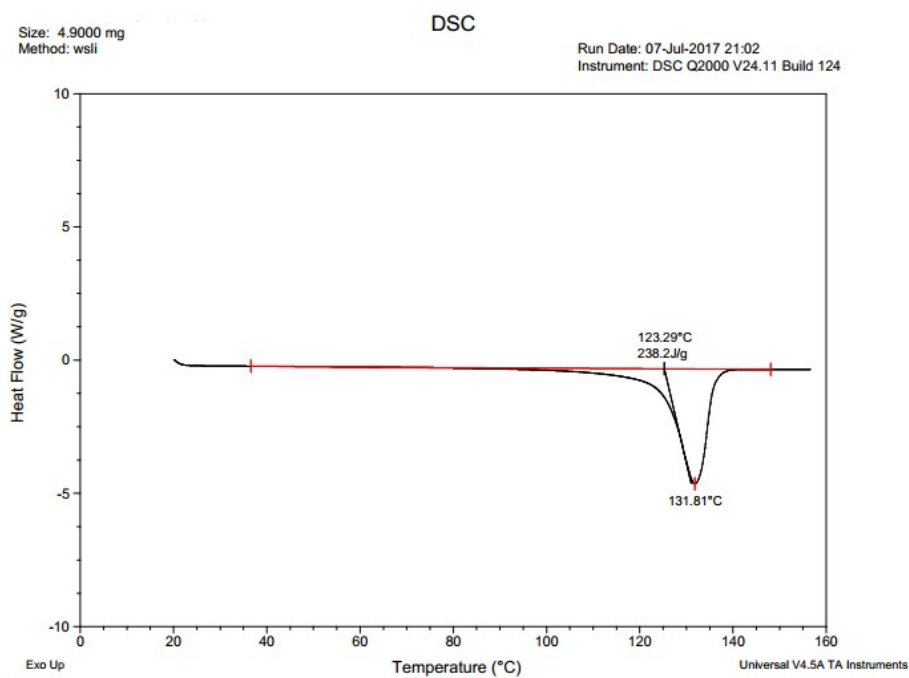

**Figure S19.** DSC thermogram of the polyethylene obtained using **Fe<sub>3</sub>/MMAO** at 10 atm ethylene (Al:Fe = 2000, 50 °C, 30 min, Table 3, entry 3)

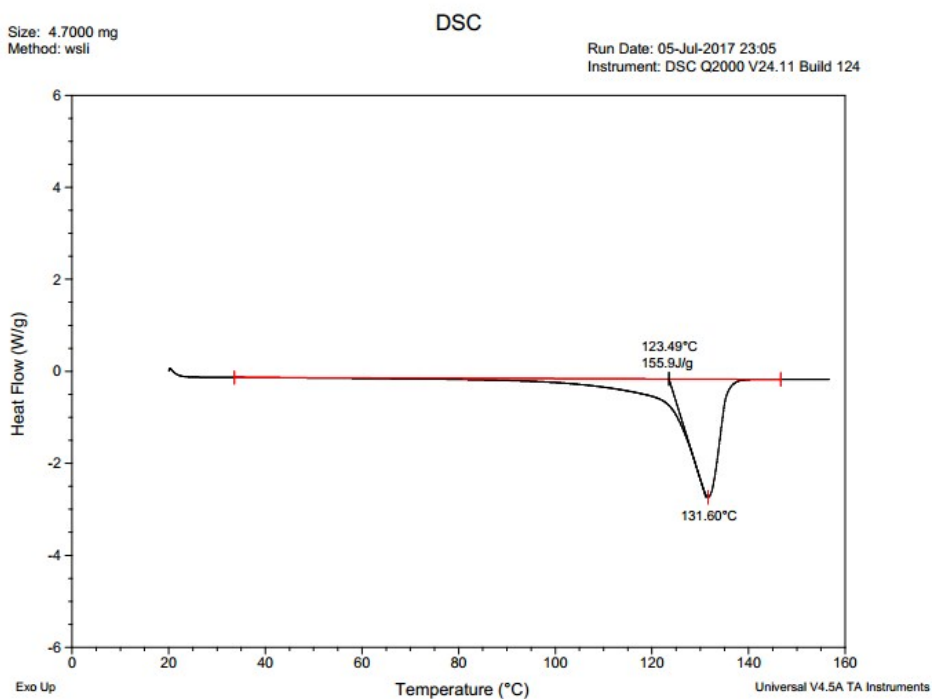

**Figure S20.** DSC thermogram of the polyethylene obtained using **Fe<sub>4</sub>/MMAO** at 10 atm ethylene (Al:Fe = 2000, 50 °C, 30 min, Table 3, entry 4)

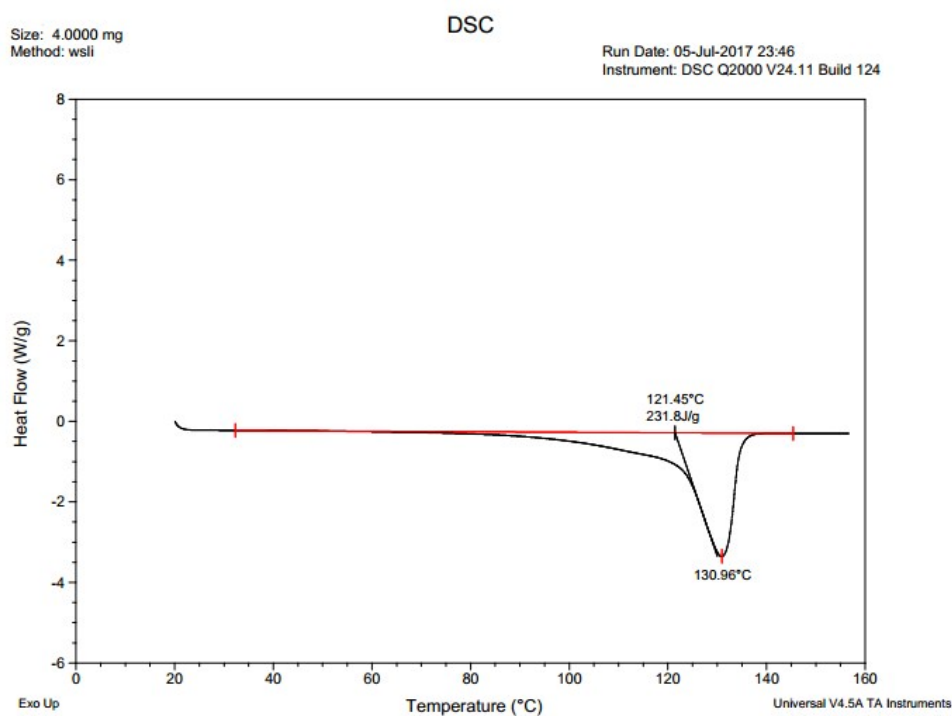

**Figure S21.** DSC thermogram of the polyethylene obtained using **Fe5**/MMAO at 10 atm ethylene (Al:Fe = 2000, 50 °C, 30 min, Table 3, entry 5)

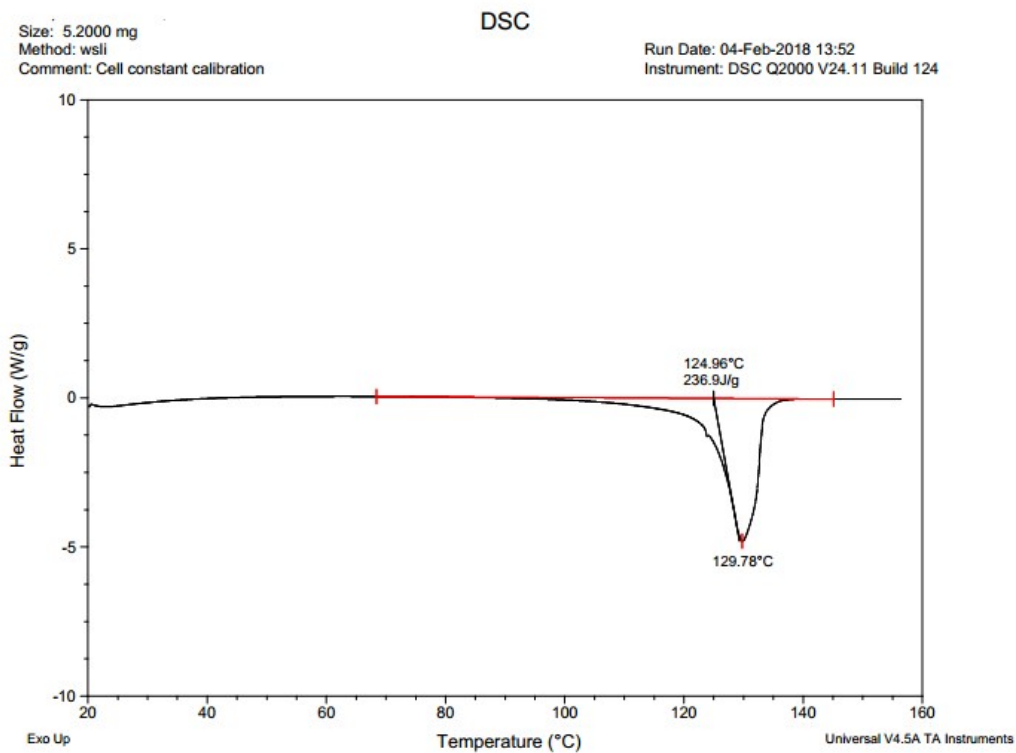

**Figure S22.** DSC thermogram of the polyethylene obtained using **Fe3'**/MMAO at 10 atm ethylene (Al:Fe = 2000, 50 °C, 30 min, Table 3, entry 6)

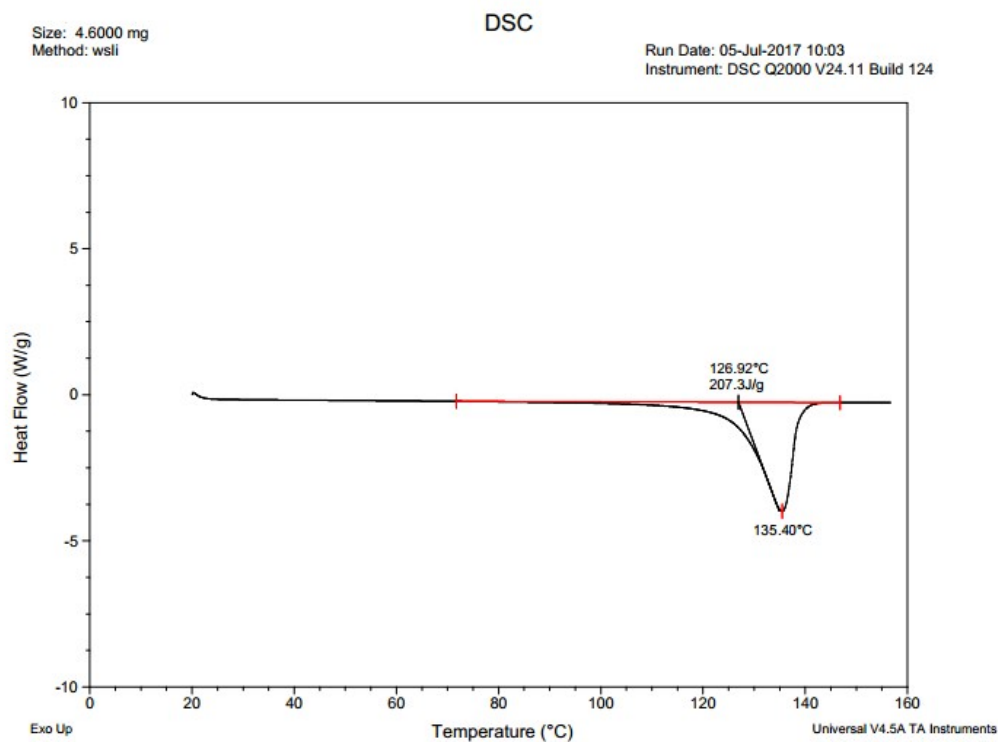

**Figure S23.** DSC thermogram of the polyethylene obtained using **Fe1**/MAO at 30 °C (Al:Fe = 2000, Table 4, entry 1)

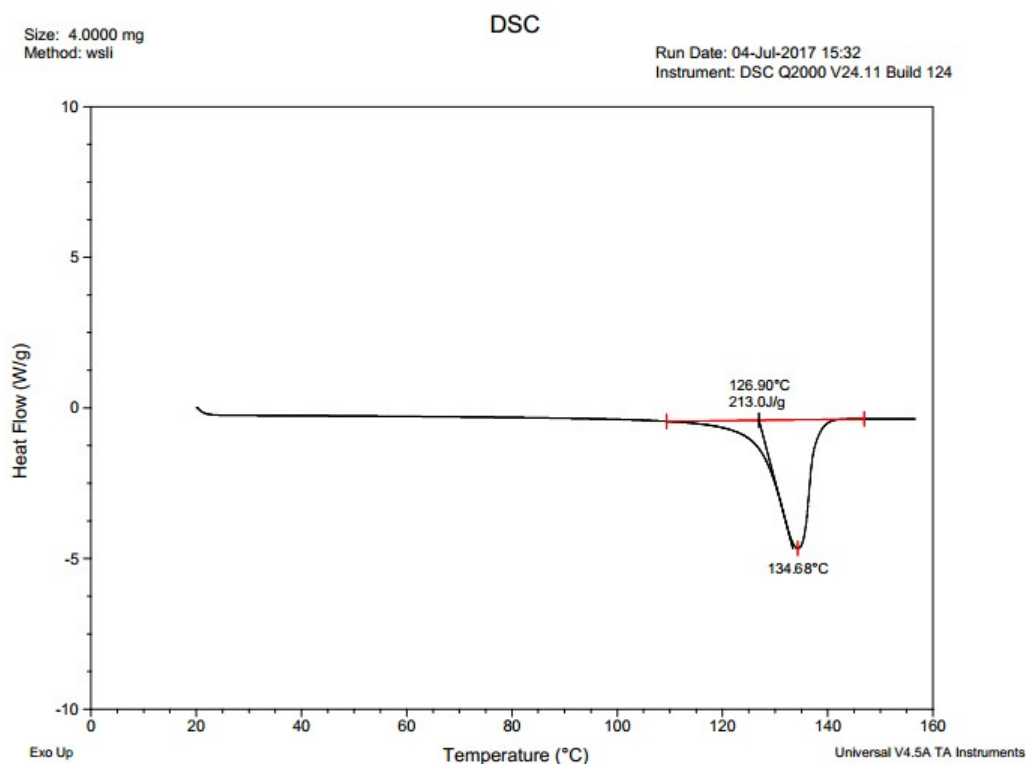

**Figure S24.** DSC thermogram of the polyethylene obtained using **Fe1**/MAO at 40 °C (Al:Fe = 2000, Table 4, entry 2)



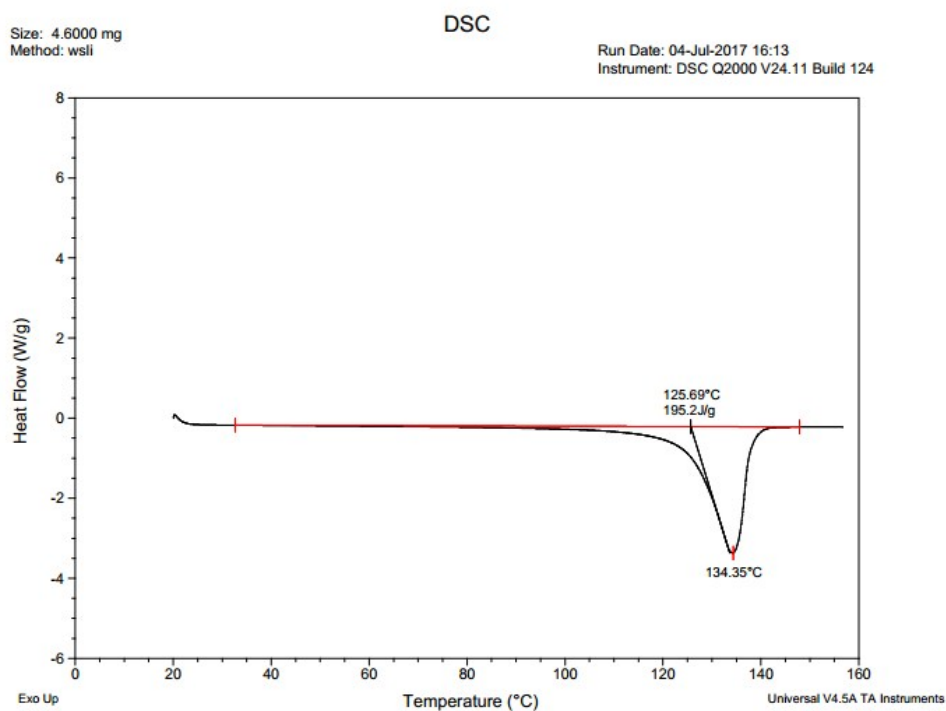

**Figure S25.** DSC thermogram of the polyethylene obtained using **Fe1**/MAO at 50 °C (Al:Fe = 2000, Table 4, entry 3)

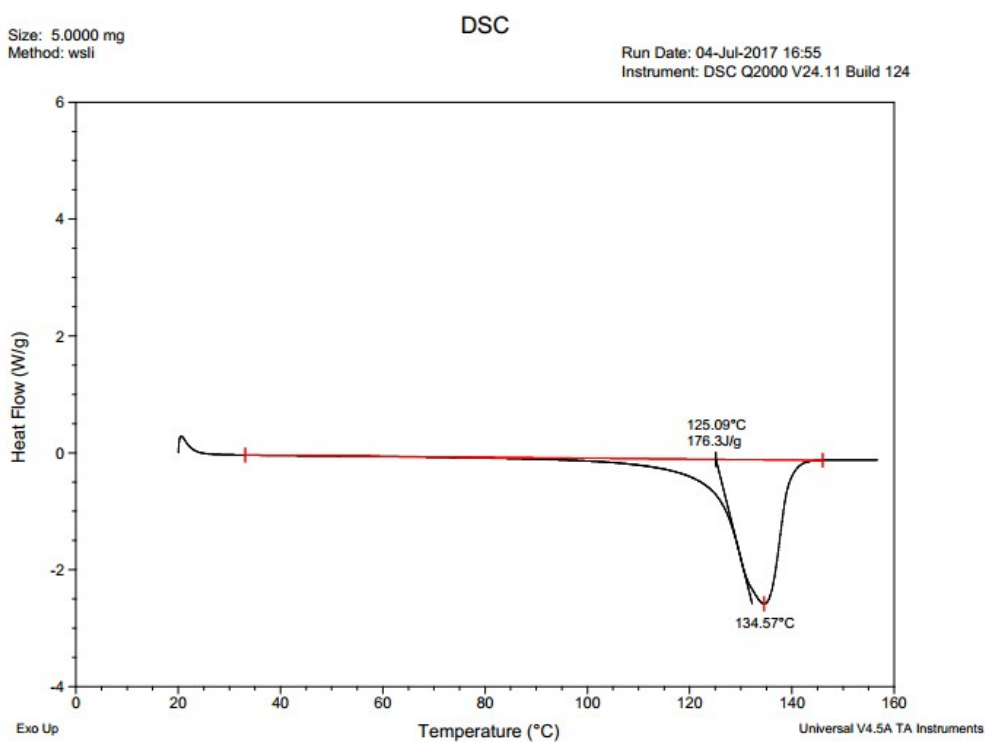

**Figure S26.** DSC thermogram of the polyethylene obtained using **Fe1**/MAO at 60 °C (Al:Fe = 2000, Table 3, entry 4)

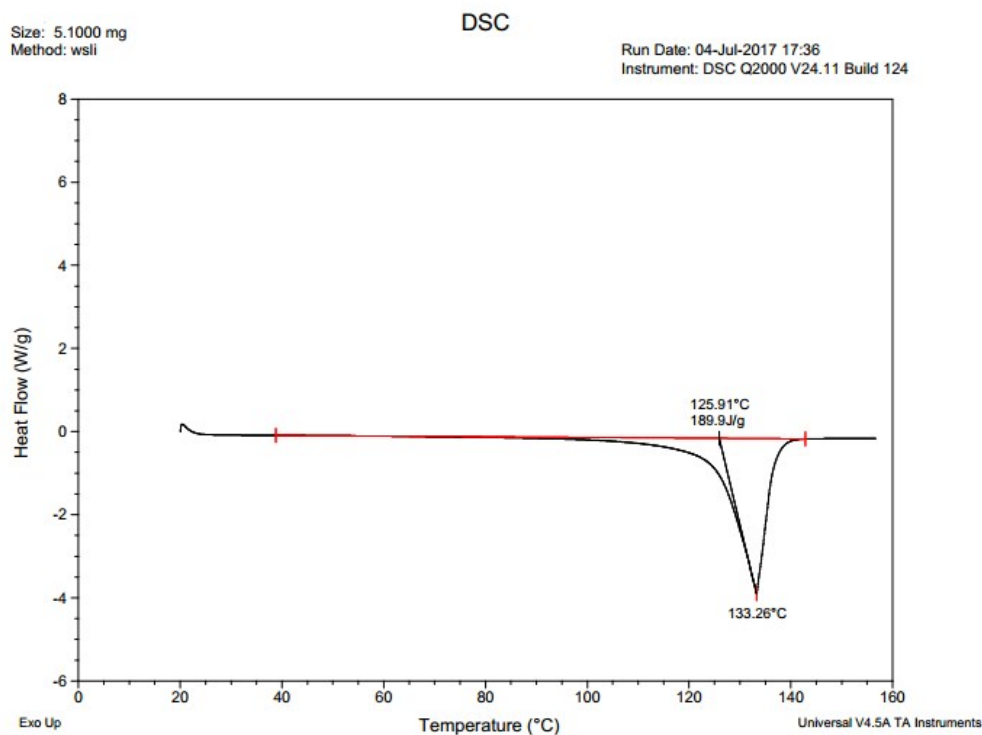

**Figure S27.** DSC thermogram of the polyethylene obtained using **Fe1/MAO** at 70 °C (Al:Fe = 2000, Table 4, entry 5)

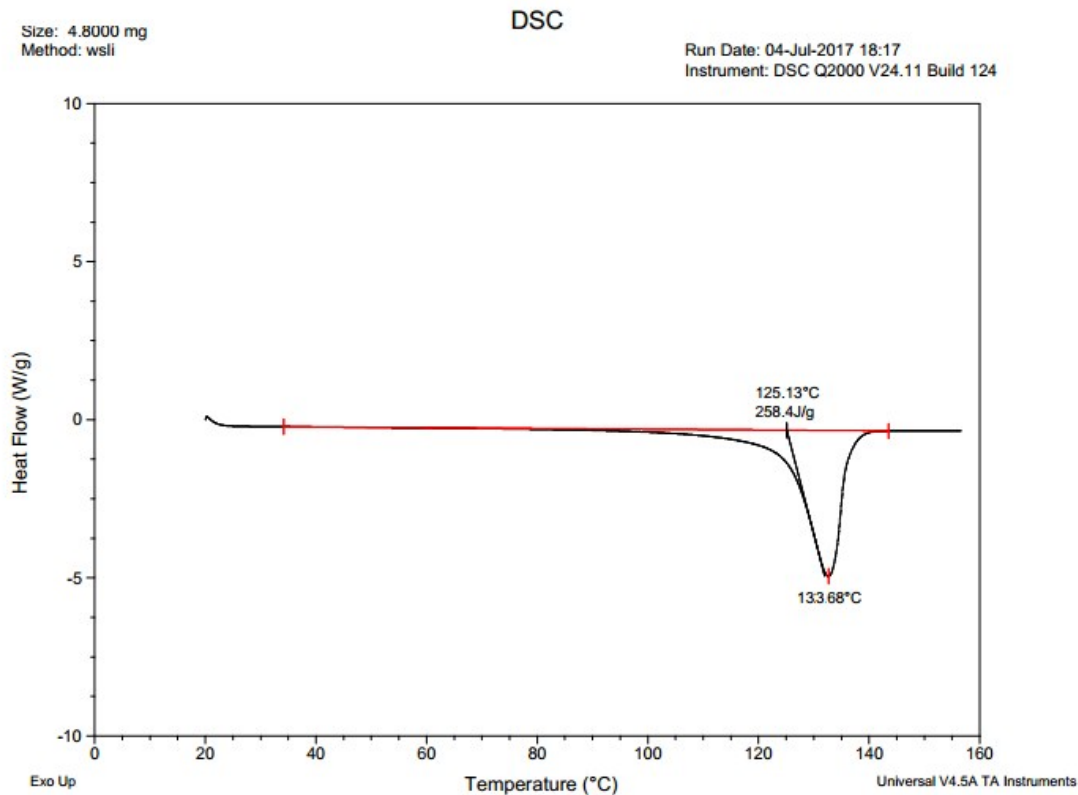

**Figure S28.** DSC thermogram of the polyethylene obtained using **Fe1/MAO** at 80 °C (Al:Fe = 2000, Table 4, entry 6)

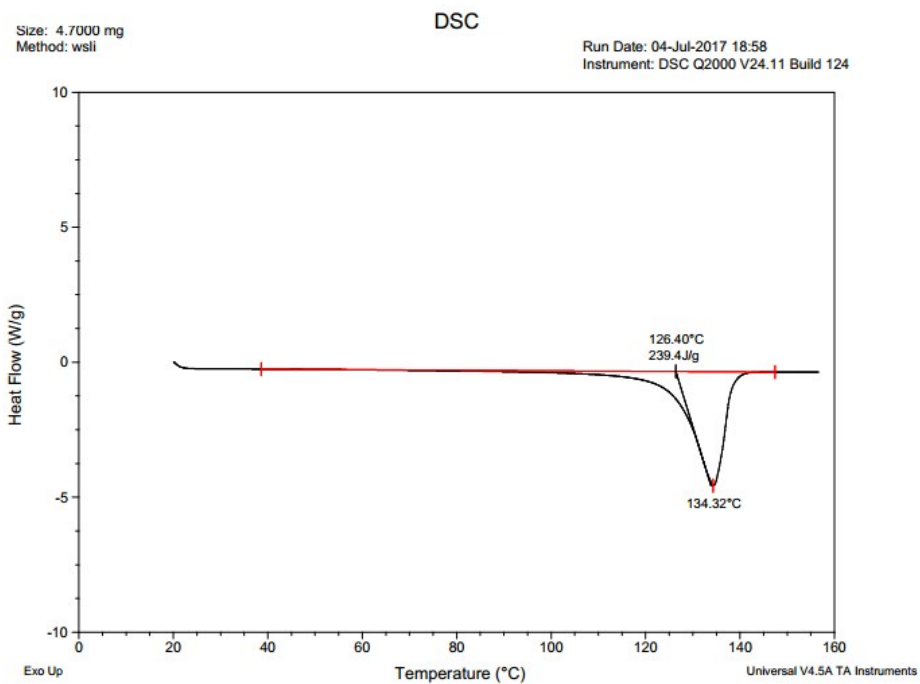

**Figure S29.** DSC thermogram of the polyethylene obtained using **Fe1**/MAO at 90 °C (Al:Fe = 2000, Table 4, entry 7)

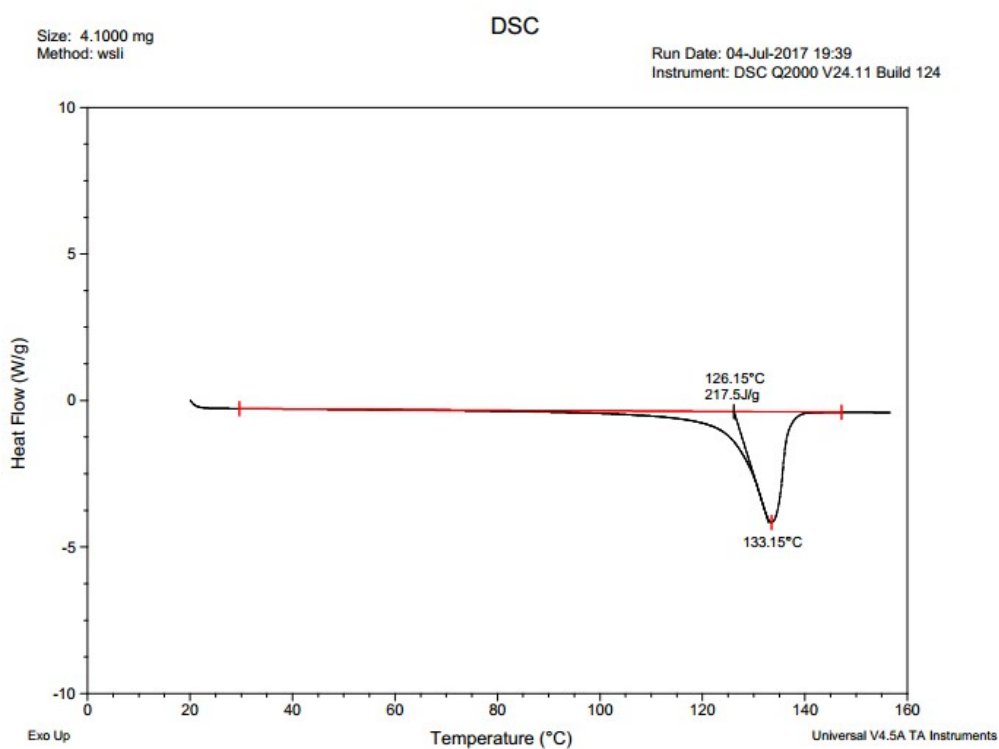

**Figure S30.** DSC thermogram of the polyethylene obtained using **Fe1**/MAO at Al:Fe = 1500 (80 °C, Table 4, entry 8)

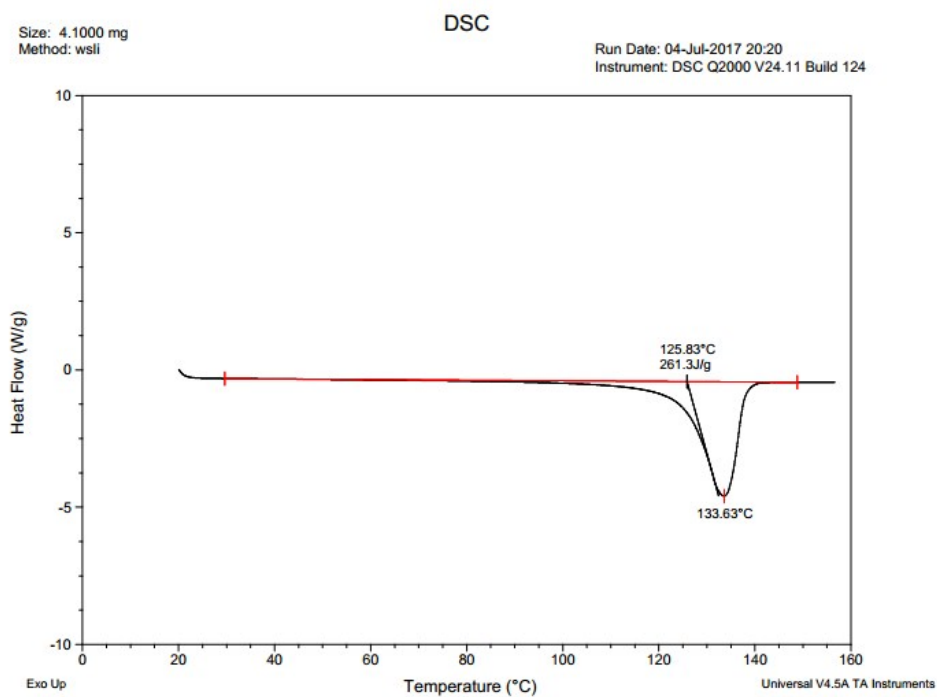

**Figure S31.** DSC thermogram of the polyethylene obtained using **Fe1**/MAO at Al:Fe = 1750 (80 °C, Table 4, entry 9)

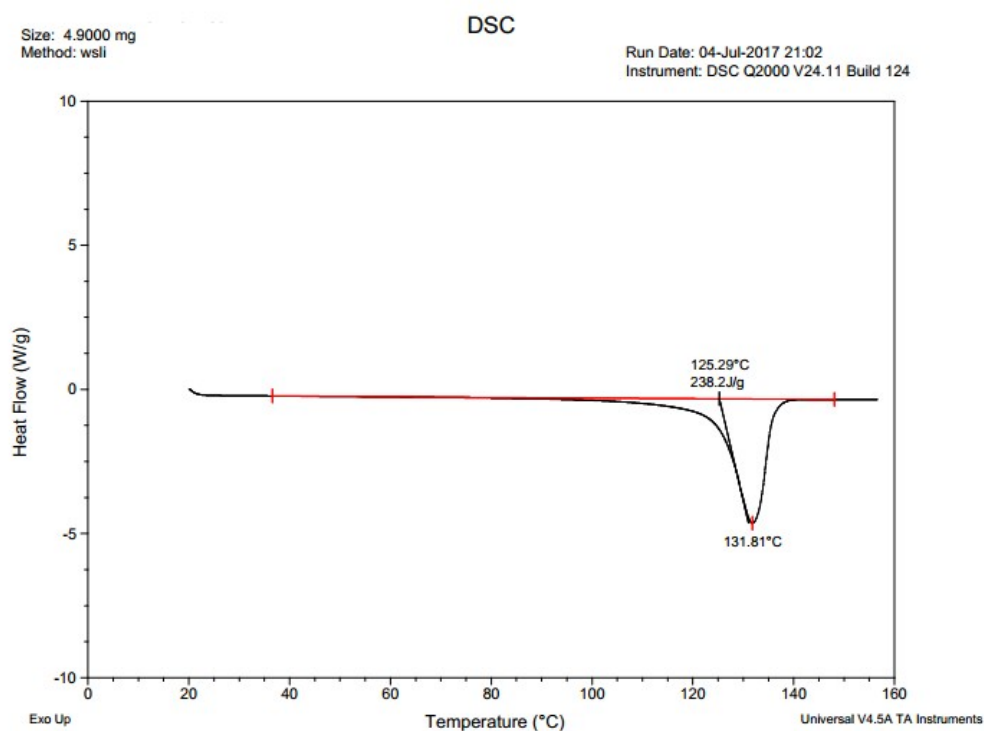

**Figure S32.** DSC thermogram of the polyethylene obtained using **Fe1**/MAO at Al:Fe = 2250 (80 °C, Table 4, entry 10)

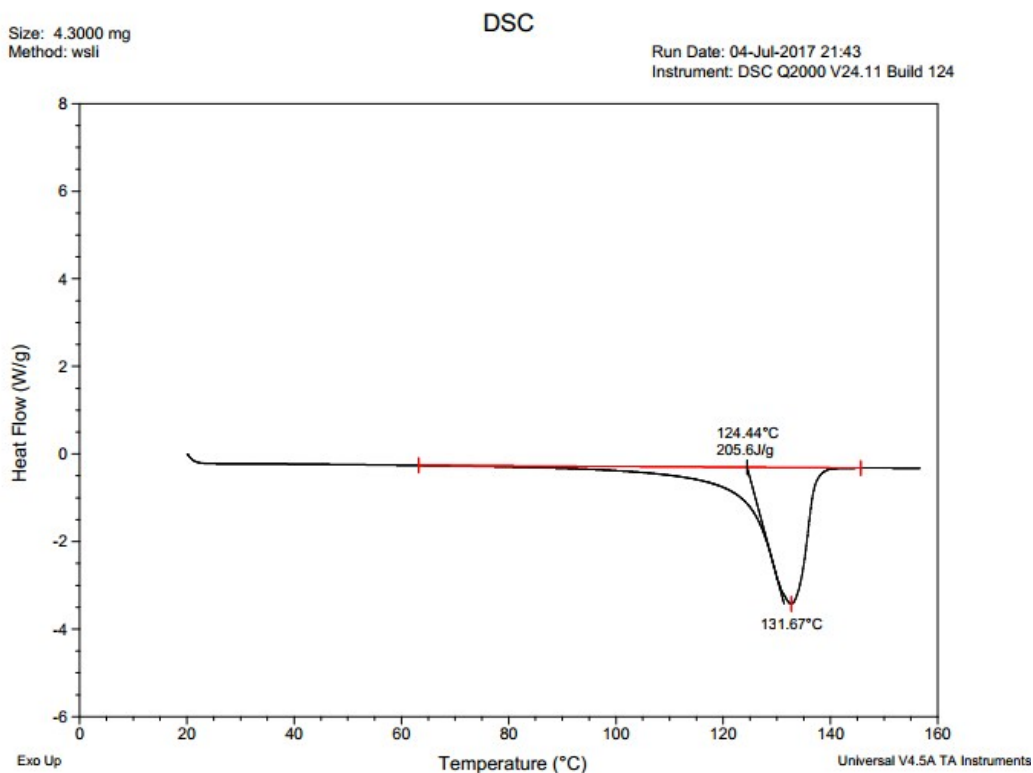

**Figure S33.** DSC thermogram of the polyethylene obtained using **Fe1**/MAO at Al:Fe = 2500 (80 °C, Table 4, entry 11)

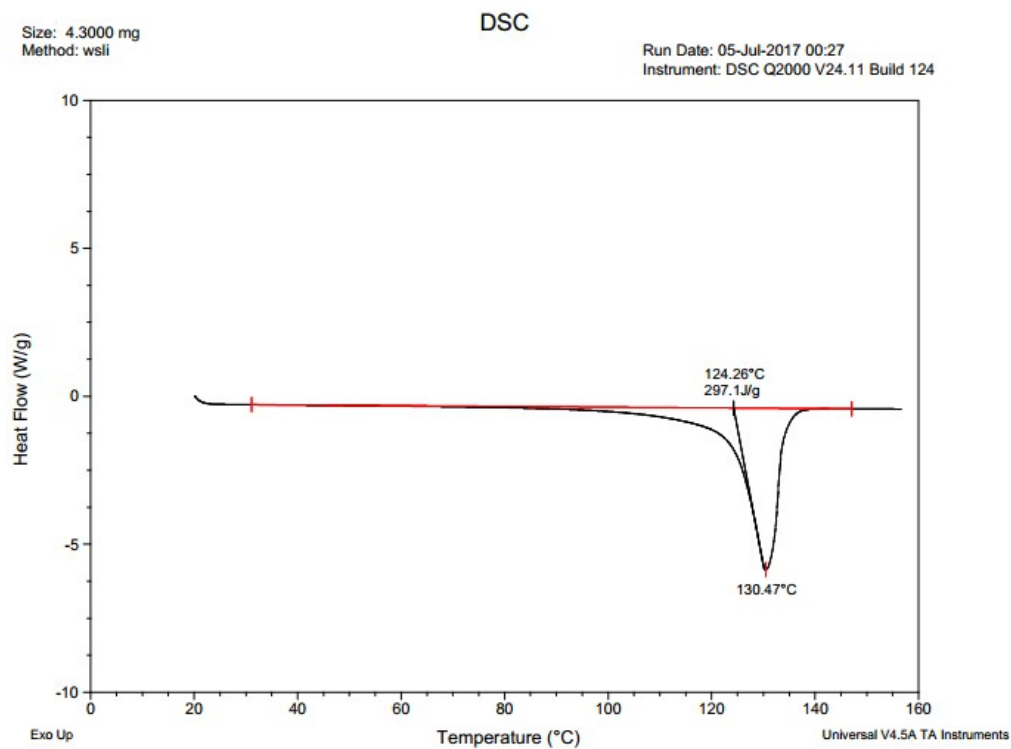

**Figure S34.** DSC thermogram of the polyethylene obtained using **Fe1**/MAO after 5 minutes (Al:Fe = 2250, 80 °C, Table 4, entry 12)

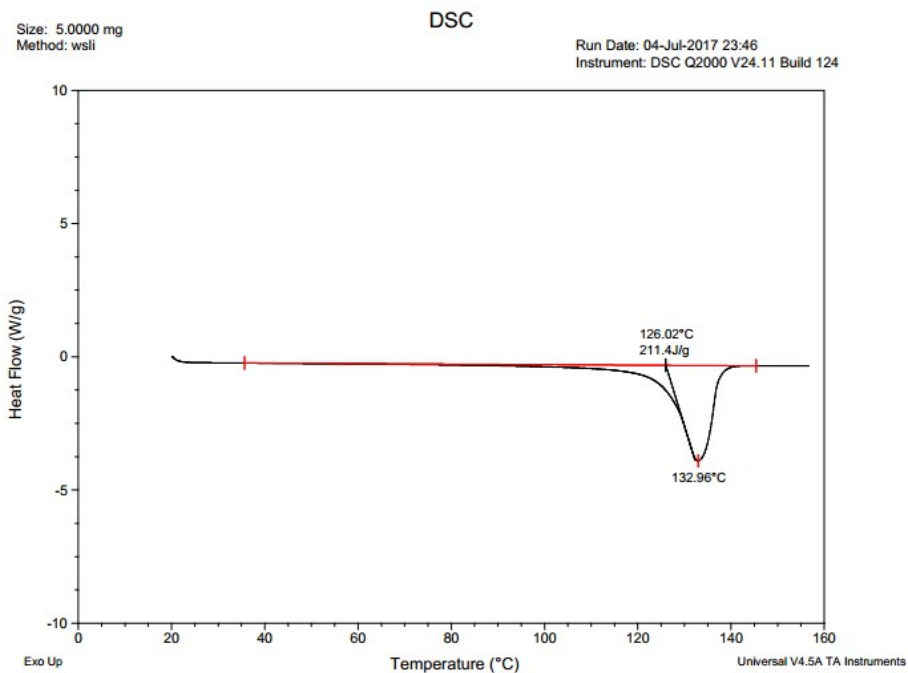

**Figure S35.** DSC thermogram of the polyethylene obtained using **Fe1/MAO** after 15 minutes (Al:Fe = 2250, 80 °C, Table 4, entry 13)

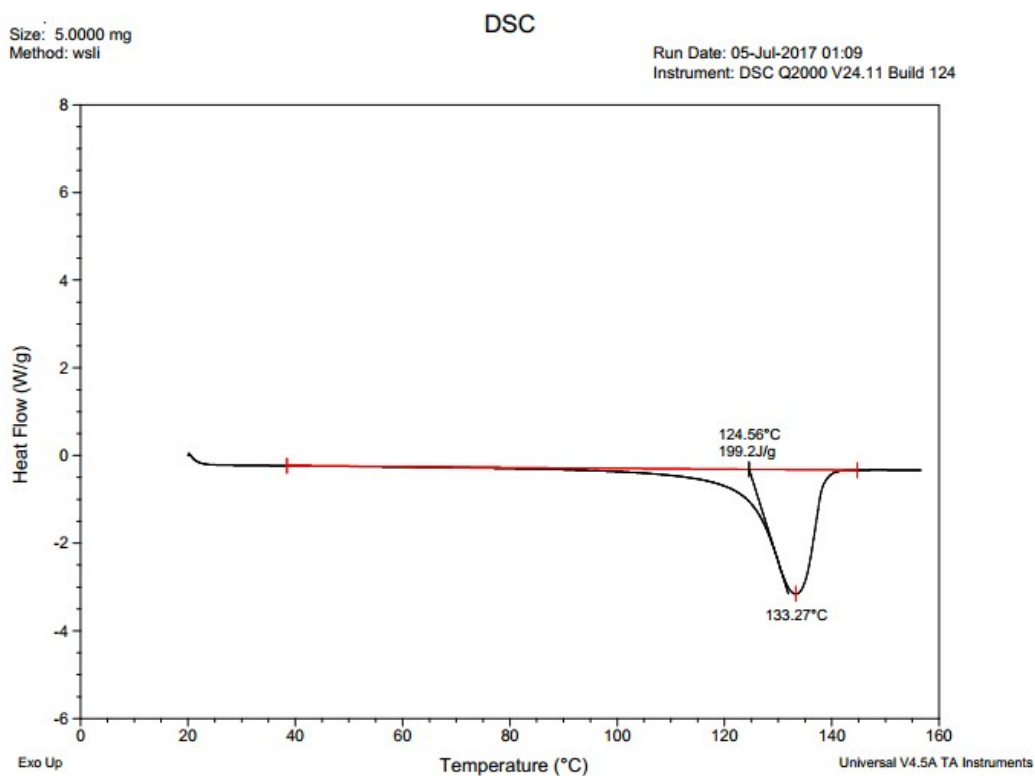

**Figure S36.** DSC thermogram of the polyethylene obtained using **Fe1/MAO** after 45 minutes (Al:Fe = 2250, 80 °C, Table 4, entry 14)

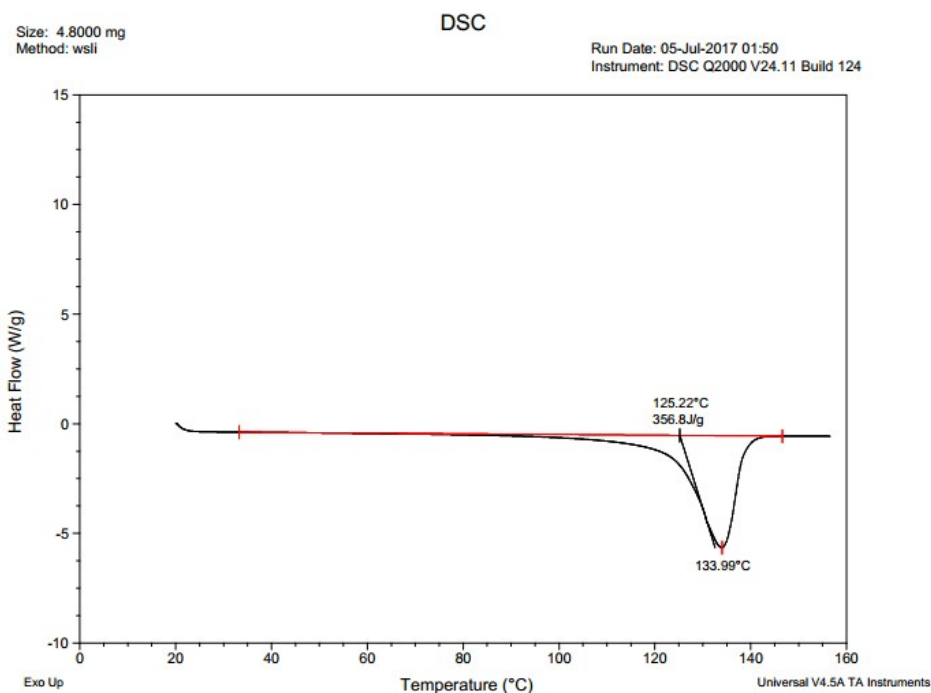

**Figure S37.** DSC thermogram of the polyethylene obtained using **Fe1**/MAO after 60 minutes (Al:Fe = 2250, 80 °C, Table 4, entry 15)

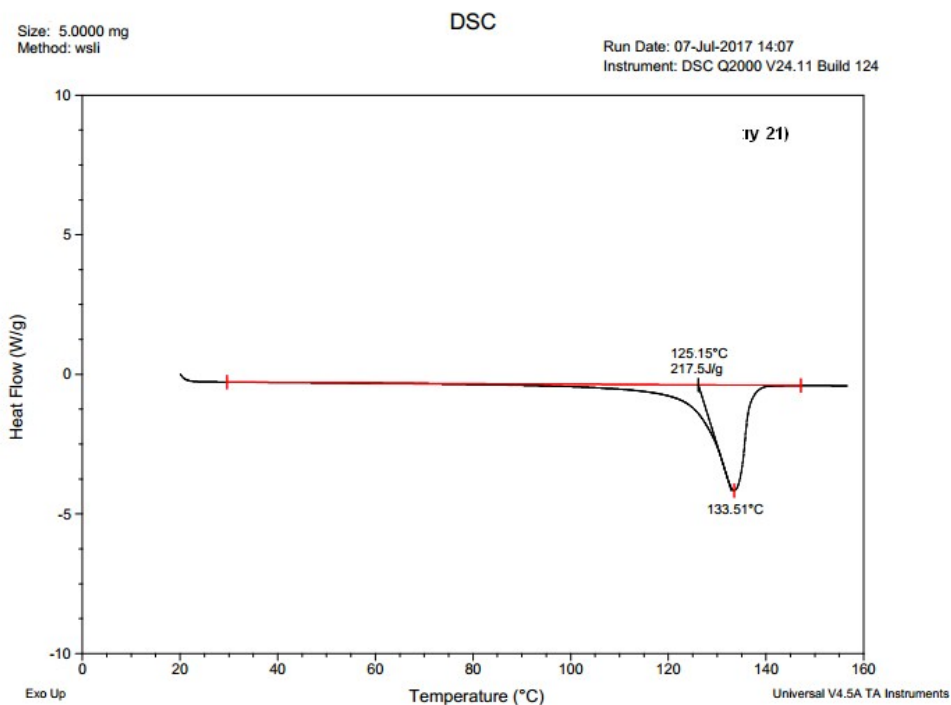

**Figure S38.** DSC thermogram of the polyethylene obtained using **Fe1**/MAO at 5 atm ethylene (Al:Fe = 2250, 80 °C, Table 4, entry 16)

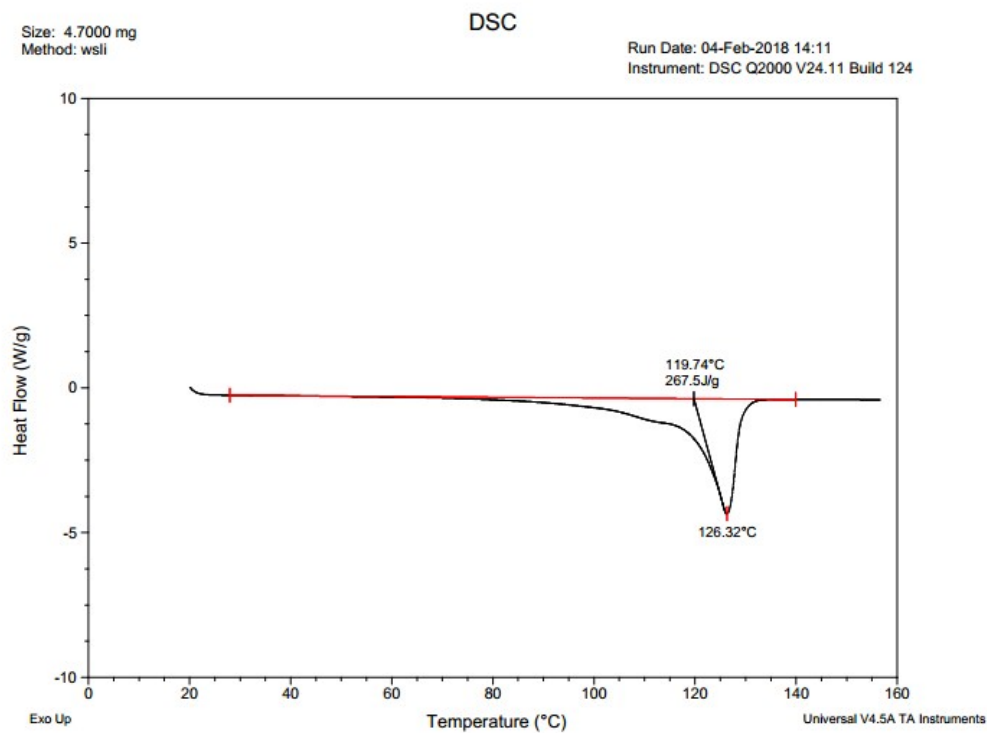

**Figure S39.** DSC thermogram of the polyethylene obtained using **Fe1**/MAO at 1 atm ethylene (Al:Fe = 2250, 80 °C, Table 4, entry 17)

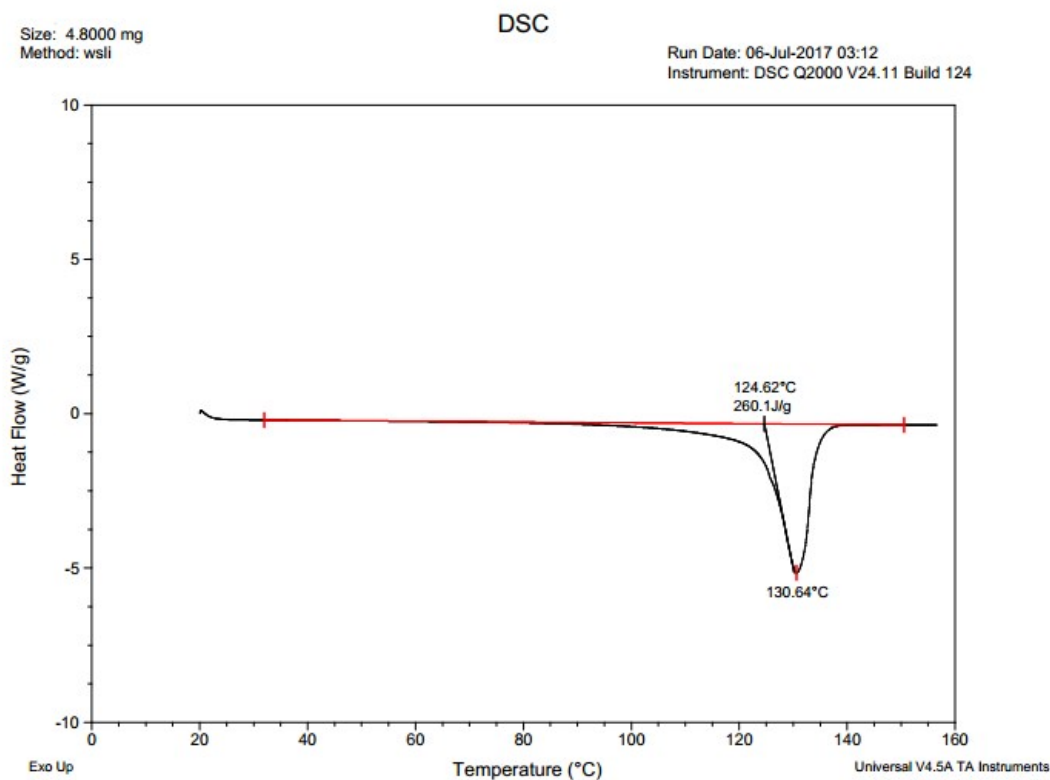

**Figure S40.** DSC thermogram of the polyethylene obtained using **Fe2**/MAO at 10 atm ethylene (Al:Fe = 2250, 80 °C, 30 min, Table 5, entry 2)



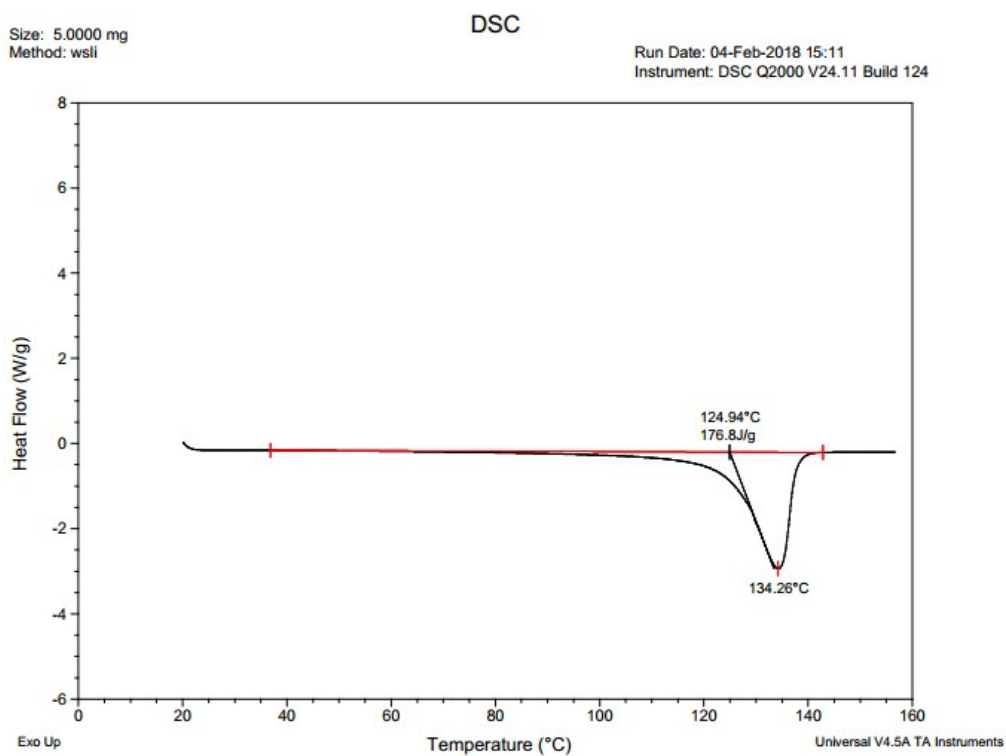

**Figure S41.** DSC thermogram of the polyethylene obtained using **Fe<sub>3</sub>**/MAO at 10 atm ethylene (Al:Fe = 2250, 80 °C, 30 min, Table 5, entry 3)

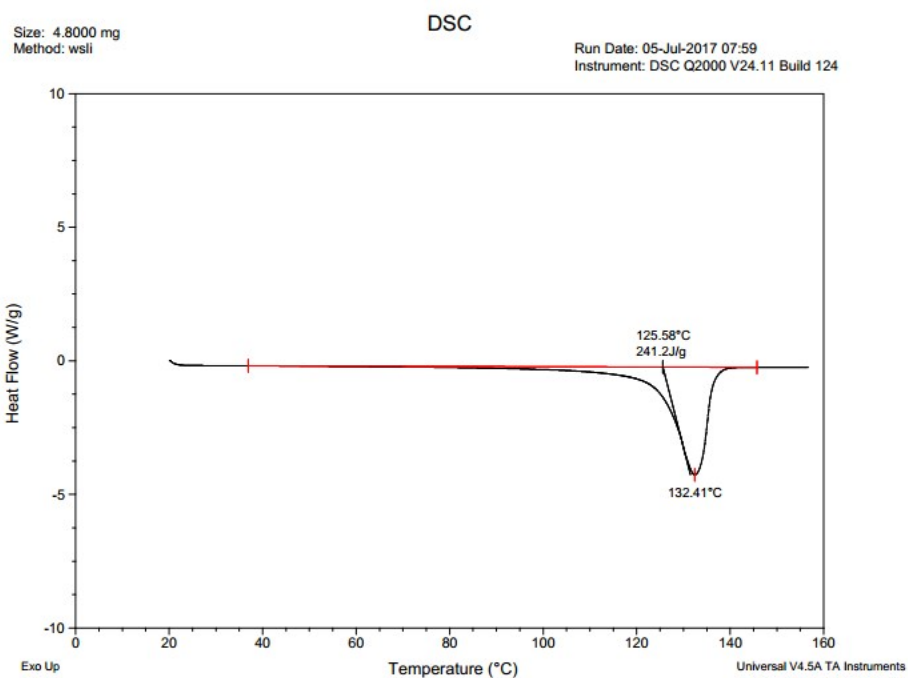

**Figure S42.** DSC thermogram of the polyethylene obtained using **Fe<sub>4</sub>**/MAO at 10 atm ethylene (Al:Fe = 2250, 80 °C, 30 min, Table 5, entry 4)

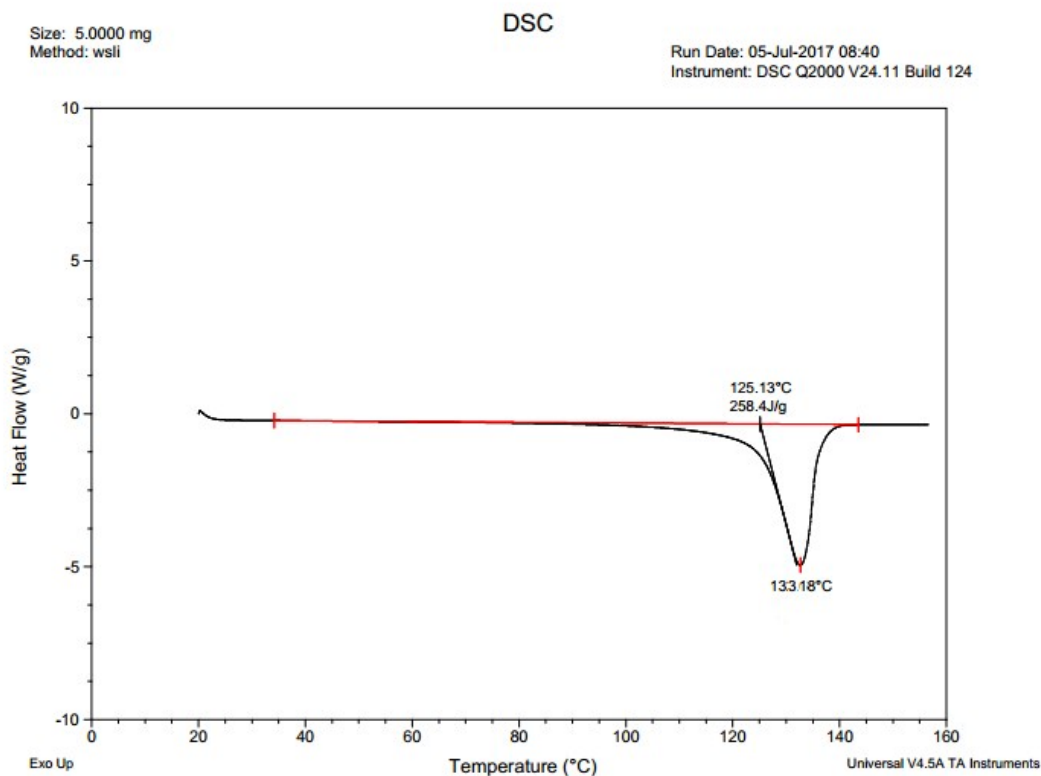

**Figure S43.** DSC thermogram of the polyethylene obtained using **Fe5**/MAO at 10 atm ethylene (Al:Fe = 2250, 80 °C, 30 min, Table 5, entry 5)

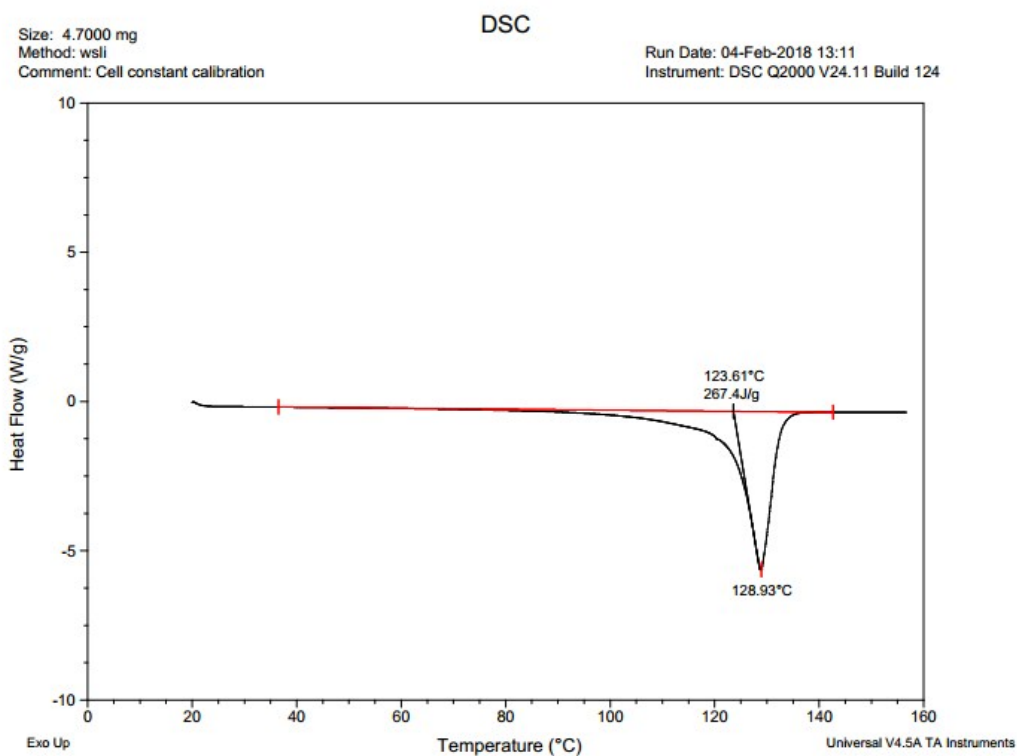

**Figure S44.** DSC thermogram of the polyethylene obtained using **Fe3'**/MAO at 10 atm ethylene (Al:Fe = 2250, 80 °C, 30 min, Table 5, entry 6)

## 6. References

- (1) R. P. Thummel, Y. Jahng, *J. Org. Chem.* 1985, **50**, 2407–2412.
- (2) Z. Wang, G. A. Solan, Q. Mahmood, Q. Liu, X. Hao, W.-H. Sun, *Organometallics*, 2018, **37**, 380–389
- (3) Q. Mahmood, J. Guo, W. Zhang, Y. Ma, T. Liang, and W.-H. Sun, *Organometallics* 2018, **37**, 957–970.
- (4) W. Zhang, W. Chai, W.-H. Sun, X. Hu, C. Redshaw, X. Hao, *Organometallics*, 2012, **31**, 5039–5048.
- (5) F. Huang, Q. Xing, T. Liang, Z. Flisak, B. Ye, X. Hu, W. Yang, W.-H. Sun, *Dalton Trans.*, 2014, **43**, 16818–16829.
- (6) Y. Zhang, H. Suo, F. Huang, T. Liang, X. Hu, W.-H. Sun, *J. Polym. Sci. Part A. Polym. Chem.*, 2017, **55**, 830–842.
- (7) S. Du, X. Wang, W. Zhang, Z. Flisak, Y. Sun, W.-H. Sun, *Polym. Chem.*, 2016, **7**, 4188–4197
